# Supplementary material for: The STAR care pathway for patients with pain at 3 months after total knee replacement: a multicentre, pragmatic, randomised, controlled trial
Source: PubMed Central journal article supplement (PMC8873030; doi:10.1016/s2665-9913(21)00371-4), 2022-01-28
Supplement: mmc1.pdf [file mmc1.pdf]

# THE LANCET

## Rheumatology

### Supplementary appendix

This appendix formed part of the original submission and has been peer reviewed. We post it as supplied by the authors.

Supplement to: Wylde V, Bertram W, Sanderson E, et al. The STAR care pathway for patients with pain at 3 months after total knee replacement: a multicentre, pragmatic, randomised, controlled trial. *Lancet Rheumatol* 2022; published online Jan 27. [https://doi.org/10.1016/S2665-9913\(21\)00371-4](https://doi.org/10.1016/S2665-9913(21)00371-4).

## Appendix

### Table of contents

|                                                                                                                |    |
|----------------------------------------------------------------------------------------------------------------|----|
| Table 1 CONSORT checklist of information to include when reporting a randomised trial.....                     | 3  |
| Table 2: Baseline characteristics .....                                                                        | 5  |
| Table 3: Demographics and patients who did and did not complete screening .....                                | 8  |
| Table 4: Baseline questionnaire completion by group.....                                                       | 8  |
| Table 5: 6 month questionnaire completion by group .....                                                       | 8  |
| Table 6: 12 month questionnaire completion by group .....                                                      | 9  |
| Table 7: Withdrawal summary by group .....                                                                     | 9  |
| Table 8: Reasons for withdrawal .....                                                                          | 9  |
| Table 9: Number of follow up calls received.....                                                               | 10 |
| Table 10: Timings of follow up calls received .....                                                            | 10 |
| Table 11: Protocol deviations .....                                                                            | 10 |
| Table 12: Summary statistics at 6 months and 12 months .....                                                   | 10 |
| Table 13: Secondary analysis – adjusting for ‘time to follow up from recruitment’ .....                        | 14 |
| Table 14: Sensitivity analysis for missing data.....                                                           | 14 |
| Table 15: Sensitivity analysis for missing data.....                                                           | 14 |
| Table 16: Overlap sensitivity analysis for BPI Severity scale .....                                            | 14 |
| Table 17: Sensitivity analysis for missing data.....                                                           | 14 |
| Table 18: Sensitivity analysis for missing data.....                                                           | 15 |
| Table 19: Sensitivity analysis excluding patients who had their assessment after 4 months post-operative ..... | 15 |
| Table 20: Repeated measures analysis of BPI subscales .....                                                    | 15 |
| Table 21: Evidence of interaction.....                                                                         | 15 |
| Table 22: Subgroup analysis of OKS categories .....                                                            | 17 |
| Table 23: Accounting for potential impact of COVID-19: Psychological outcomes .....                            | 17 |
| Table 24: OKS sensitivity analysis: missing data.....                                                          | 17 |
| Table 25: OKS sensitivity analysis: per protocol .....                                                         | 18 |
| Table 26: DN-4 sensitivity analysis: missing data.....                                                         | 18 |
| Table 27: DN-4 sensitivity analysis: per protocol .....                                                        | 18 |
| Table 28: PainDETECT sensitivity analysis: missing data .....                                                  | 18 |
| Table 29: PainDETECT sensitivity analysis: per protocol .....                                                  | 18 |
| Table 30: PCS sensitivity analysis: missing data.....                                                          | 18 |
| Table 31: PCS sensitivity analysis: per protocol .....                                                         | 18 |
| Table 32: PaSol sensitivity analysis: missing data .....                                                       | 19 |
| Table 33: PaSol sensitivity analysis: per protocol .....                                                       | 19 |
| Table 34: Patient satisfaction sensitivity analysis: missing data.....                                         | 19 |
| Table 35: Patient satisfaction sensitivity analysis: per protocol .....                                        | 19 |
| Table 36: ICECAP-A sensitivity analysis: missing data .....                                                    | 19 |
| Table 37: ICECAP-A sensitivity analysis: per protocol.....                                                     | 19 |

|                                                                                                                |    |
|----------------------------------------------------------------------------------------------------------------|----|
| Table 38: SF-12 sensitivity analysis: missing data .....                                                       | 20 |
| Table 39: SF-12 sensitivity analysis: per protocol.....                                                        | 20 |
| Table 40: HADS anxiety scale sensitivity analysis: missing data .....                                          | 20 |
| Table 41: HADS anxiety scale sensitivity analysis: per protocol.....                                           | 20 |
| Table 42: HADS depression scale sensitivity analysis: missing data .....                                       | 20 |
| Table 43: HADS depression scale sensitivity analysis: per protocol.....                                        | 20 |
| Table 44: Chronic widespread pain sensitivity analysis: missing data .....                                     | 20 |
| Table 45: Chronic widespread pain sensitivity analysis: per protocol.....                                      | 21 |
| Table 46: Frequency of pain sensitivity analysis: missing data.....                                            | 21 |
| Table 47: Frequency of pain sensitivity analysis: per protocol.....                                            | 21 |
| Table 48: Comparison of pain to pre-operative pain sensitivity analysis: missing data .....                    | 21 |
| Table 49: Comparison of pain to pre-operative pain sensitivity analysis: per protocol.....                     | 21 |
| Table 50: Adverse reactions .....                                                                              | 21 |
| Table 51: Responder analysis .....                                                                             | 22 |
| Table 52 Studies from systematic review .....                                                                  | 22 |
| Table 53 CHEERS checklist.....                                                                                 | 24 |
| Table 54 Resources collected and their valuation (2019/20 prices excluding VAT).....                           | 29 |
| Table 55 Mean resource use from an NHS and PSS perspective by category and randomised allocation.....          | 30 |
| Table 56 Mean resource use from a patient perspective by category and randomised allocation <sup>1</sup> ..... | 31 |
| Table 57 Mean costs from an NHS and PSS perspective by category and randomised allocation.....                 | 31 |
| Table 58 Mean utilities over time and by randomised allocation .....                                           | 32 |
| Table 59 VAS scores over time and by randomised allocation .....                                               | 32 |
| Table 60 One-way sensitivity analyses for the economic evaluation .....                                        | 33 |
| <br>                                                                                                           |    |
| Figure 1: Unadjusted mean BPI severity score with confidence intervals at baseline and follow-up .....         | 13 |
| Figure 2: Unadjusted mean BPI interference score with confidence intervals at baseline and follow-up .....     | 13 |
| Figure 3: Treatment effect on BPI severity over differing levels of OKS (continuous) at baseline .....         | 16 |
| Figure 4: Treatment effect on BPI interference over differing levels of OKS (continuous) at baseline.....      | 16 |
| Figure 5: Cost-effectiveness acceptability curve from the NHS/PSS perspective.....                             | 28 |
| <br>                                                                                                           |    |
| Supplementary Information relating to the economic evaluation.....                                             | 23 |
| STAR trial sites.....                                                                                          | 36 |
| Trial Steering Committee members.....                                                                          | 36 |
| Members of the STAR trial group.....                                                                           | 36 |
| References.....                                                                                                | 37 |

**Table 1 CONSORT checklist of information to include when reporting a randomised trial**

| Section/Topic                    | Item No | Checklist item                                                                                                                                                                              | Where reported                      |
|----------------------------------|---------|---------------------------------------------------------------------------------------------------------------------------------------------------------------------------------------------|-------------------------------------|
| <b>Title and abstract</b>        |         |                                                                                                                                                                                             |                                     |
|                                  | 1a      | Identification as a randomised trial in the title                                                                                                                                           | Title                               |
|                                  | 1b      | Structured summary of trial design, methods, results, and conclusions (for specific guidance see CONSORT for abstracts)                                                                     | Abstract                            |
| <b>Introduction</b>              |         |                                                                                                                                                                                             |                                     |
| Background and objectives        | 2a      | Scientific background and explanation of rationale                                                                                                                                          | Background                          |
|                                  | 2b      | Specific objectives or hypotheses                                                                                                                                                           | Background                          |
| <b>Methods</b>                   |         |                                                                                                                                                                                             |                                     |
| Trial design                     | 3a      | Description of trial design (such as parallel, factorial) including allocation ratio                                                                                                        | Methods – study design              |
|                                  | 3b      | Important changes to methods after trial commencement (such as eligibility criteria), with reasons                                                                                          | N/A                                 |
| Participants                     | 4a      | Eligibility criteria for participants                                                                                                                                                       | Methods – participants              |
|                                  | 4b      | Settings and locations where the data were collected                                                                                                                                        | Methods – study design              |
| Interventions                    | 5       | The interventions for each group with sufficient details to allow replication, including how and when they were actually administered                                                       | Methods – procedures                |
| Outcomes                         | 6a      | Completely defined pre-specified primary and secondary outcome measures, including how and when they were assessed                                                                          | Methods – outcomes                  |
|                                  | 6b      | Any changes to trial outcomes after the trial commenced, with reasons                                                                                                                       | N/A                                 |
| Sample size                      | 7a      | How sample size was determined                                                                                                                                                              | Methods – statistical analysis      |
|                                  | 7b      | When applicable, explanation of any interim analyses and stopping guidelines                                                                                                                | N/A                                 |
| Randomisation:                   |         |                                                                                                                                                                                             |                                     |
| Sequence generation              | 8a      | Method used to generate the random allocation sequence                                                                                                                                      | Methods – randomisation and masking |
|                                  | 8b      | Type of randomisation; details of any restriction (such as blocking and block size)                                                                                                         | Methods – randomisation and masking |
| Allocation concealment mechanism | 9       | Mechanism used to implement the random allocation sequence (such as sequentially numbered containers), describing any steps taken to conceal the sequence until interventions were assigned | Methods – randomisation and masking |
| Implementation                   | 10      | Who generated the random allocation sequence, who enrolled participants, and who assigned participants to interventions                                                                     | Methods – randomisation and masking |
| Blinding                         | 11a     | If done, who was blinded after assignment to interventions (for example, participants, care providers, those assessing outcomes) and how                                                    | Methods – randomisation and masking |
|                                  | 11b     | If relevant, description of the similarity of interventions                                                                                                                                 | Methods – procedures                |
| Statistical methods              | 12a     | Statistical methods used to compare groups for primary and secondary outcomes                                                                                                               | Methods – statistical analysis      |
|                                  | 12b     | Methods for additional analyses, such as subgroup analyses and adjusted analyses                                                                                                            | Methods – statistical analysis      |
| <b>Results</b>                   |         |                                                                                                                                                                                             |                                     |

|                                                      |     |                                                                                                                                                   |                                                |
|------------------------------------------------------|-----|---------------------------------------------------------------------------------------------------------------------------------------------------|------------------------------------------------|
| Participant flow (a diagram is strongly recommended) | 13a | For each group, the numbers of participants who were randomly assigned, received intended treatment, and were analysed for the primary outcome    | Results – first and second paragraph; Figure 1 |
|                                                      | 13b | For each group, losses and exclusions after randomisation, together with reasons                                                                  | Results – second paragraph; Figure 1           |
| Recruitment                                          | 14a | Dates defining the periods of recruitment and follow-up                                                                                           | Results – first paragraph                      |
|                                                      | 14b | Why the trial ended or was stopped                                                                                                                | N/A                                            |
| Baseline data                                        | 15  | A table showing baseline demographic and clinical characteristics for each group                                                                  | Table 1                                        |
| Numbers analysed                                     | 16  | For each group, number of participants (denominator) included in each analysis and whether the analysis was by original assigned groups           | Tables                                         |
| Outcomes and estimation                              | 17a | For each primary and secondary outcome, results for each group, and the estimated effect size and its precision (such as 95% confidence interval) | Table 2                                        |
|                                                      | 17b | For binary outcomes, presentation of both absolute and relative effect sizes is recommended                                                       | Table 2                                        |
| Ancillary analyses                                   | 18  | Results of any other analyses performed, including subgroup analyses and adjusted analyses, distinguishing pre-specified from exploratory         | Supplementary material                         |
| Harms                                                | 19  | All important harms or unintended effects in each group (for specific guidance see CONSORT for harms)                                             | Supplementary material                         |
| <b>Discussion</b>                                    |     |                                                                                                                                                   |                                                |
| Limitations                                          | 20  | Trial limitations, addressing sources of potential bias, imprecision, and, if relevant, multiplicity of analyses                                  | Discussion, paragraph 2                        |
| Generalisability                                     | 21  | Generalisability (external validity, applicability) of the trial findings                                                                         | Discussion, paragraph 2                        |
| Interpretation                                       | 22  | Interpretation consistent with results, balancing benefits and harms, and considering other relevant evidence                                     | Discussion                                     |
| <b>Other information</b>                             |     |                                                                                                                                                   |                                                |
| Registration                                         | 23  | Registration number and name of trial registry                                                                                                    | Abstract                                       |
| Protocol                                             | 24  | Where the full trial protocol can be accessed, if available                                                                                       | Methods – study design                         |
| Funding                                              | 25  | Sources of funding and other support (such as supply of drugs), role of funders                                                                   | Abstract, funding acknowledgement              |

**Table 2: Baseline characteristics**

|                                      |                        | Overall      | Intervention                                     | Usual care            |
|--------------------------------------|------------------------|--------------|--------------------------------------------------|-----------------------|
| <b>Gender (male)</b>                 | N (%)                  | 146 (40.22)  | 101 (41.74)                                      | 45 (37.19)            |
| <b>Age</b>                           | N                      | 363          | 242                                              | 120                   |
|                                      | Mean (SD)              | 67.15 (8.71) | 67.01 (8.52)                                     | 67.38 (9.14)          |
| <b>Marital Status</b>                | N                      | 356          | 240                                              | 116                   |
|                                      | Single (%)             | 25 (7.02)    | 14 (5.83%)                                       | 11 (9.48%)            |
|                                      | Married/ partner (%)   | 251 (70.51)  | 170 (70.83%)                                     | 81 (69.83%)           |
|                                      | Separated (%)          | 35 (9.83)    | 22 (9.17%)                                       | 13 (11.21%)           |
|                                      | Widowed (%)            | 45 (12.64)   | 34 (14.17%)                                      | 11 (9.48%)            |
| <b>Living arrangement</b>            | N                      | 356          | 240                                              | 116                   |
|                                      | Alone (%)              | 78 (21.91)   | 56 (23.33%)                                      | 22 (18.97%)           |
|                                      | With Partner (%)       | 253 (71.07)  | 171 (71.25%)                                     | 82 (70.69%)           |
|                                      | With Somebody else (%) | 22 (6.18)    | 11 (4.58%)                                       | 11 (9.48%)            |
|                                      | Other (%)              | 3 (0.84)     | 2 (0.83%)                                        | 1 (0.86%)             |
| <b>Ethnic Group</b>                  | N                      | 356          | 240                                              | 116                   |
|                                      | White (%)              | 335 (94.10)  | 226 (94.17%)                                     | 109 (93.97%)          |
|                                      | Mixed (%)              | 1 (0.28)     | 1 (0.42%)                                        | 0                     |
|                                      | Asian (%)              | 11 (3.09)    | 6 (2.50%)                                        | 5 (4.31%)             |
|                                      | Black (%)              | 5 (1.40)     | 4 (1.67%)                                        | 1 (0.86%)             |
|                                      | Other (%)              | 4 (1.12)     | 3 (1.25%) ["Iranian", "Not sure", not specified] | 1 (0.86%) ["Burmese"] |
| <b>Education level</b>               | N                      | 319          | 214                                              | 105                   |
|                                      | Before 16              | 22 (6.90)    | 14 (6.54%)                                       | 8 (7.62%)             |
|                                      | At 16                  | 194 (60.82)  | 133 (62.15%)                                     | 61 (58.10%)           |
|                                      | college                | 61 (19.12)   | 39 (18.22%)                                      | 22 (20.95%)           |
|                                      | university degree      | 15 (4.70)    | 13 (6.07%)                                       | 2 (1.90%)             |
|                                      | Post-graduate          | 24 (7.52)    | 12 (5.61%)                                       | 12 (11.43%)           |
|                                      | Other                  | 3 (0.94)     | 3 (1.40%)                                        | 0                     |
| <b>DN-4 (neuropathic pain)</b>       | N                      | 359          | 240                                              | 119                   |
|                                      | Yes; N (%)             | 267 (74.37)  | 181 (75.42%)                                     | 86 (72.27%)           |
|                                      | No; N (%)              | 92 (25.63)   | 59 (24.58%)                                      | 33 (27.73%)           |
| <b>PainDETECT (neuropathic pain)</b> | N                      | 363          | 242                                              | 121                   |
|                                      | Unlikely; N (%)        | 76 (20.94)   | 45 (18.60%)                                      | 31 (25.62%)           |
|                                      | Ambiguous; N (%)       | 96 (26.45)   | 66 (27.27%)                                      | 30 (24.79%)           |
|                                      | Likely; N (%)          | 191 (52.62)  | 131 (54.13%)                                     | 60 (49.59%)           |
| <b>HADS: Anxiety</b>                 | N                      | 363          | 242                                              | 121                   |
|                                      | Number of "Normal" (%) | 197 (54.27)  | 124 (51.24%)                                     | 73 (60.33%)           |
|                                      | # "Borderline" (%)     | 71 (19.56)   | 51 (21.07%)                                      | 20 (16.53%)           |
|                                      | # "Clinical" (%)       | 95 (26.17)   | 67 (27.69%)                                      | 28 (23.14%)           |
| <b>HADS: Depression</b>              | N                      | 362          | 242                                              | 120                   |
|                                      | Number of "Normal" (%) | 177 (48.90)  | 114 (47.11%)                                     | 63 (52.50%)           |
|                                      | # "Borderline" (%)     | 91 (25.14)   | 62 (25.62%)                                      | 29 (24.17%)           |
|                                      | # "Clinical" (%)       | 94 (25.97)   | 66 (27.27%)                                      | 28 (23.33%)           |

|                                                                                                                       |                                    |             |              |              |
|-----------------------------------------------------------------------------------------------------------------------|------------------------------------|-------------|--------------|--------------|
| <b>Frequency of pain Q1<sup>2</sup></b>                                                                               | <b>N</b>                           | 361         | 242          | 119          |
|                                                                                                                       | <b># “Rarely” (%)</b>              | 1 (0.28)    | 1 (0.41%)    | 0            |
|                                                                                                                       | <b># “Sometimes” (%)</b>           | 40 (11.08)  | 26 (10.74%)  | 14 (11.76%)  |
|                                                                                                                       | <b># “Often” (%)</b>               | 98 (27.15)  | 60 (24.79%)  | 38 (31.93 %) |
|                                                                                                                       | <b># “Most of the time” (%)</b>    | 164 (45.43) | 109 (45.04%) | 55 (46.22%)  |
|                                                                                                                       | <b># “All of the time” (%)</b>     | 58 (16.07)  | 46 (19.01%)  | 12 (10.08%)  |
| <b>Frequency of pain Q2<sup>3</sup></b>                                                                               | <b>N</b>                           | 362         | 242          | 120          |
|                                                                                                                       | <b># “Rarely” (%)</b>              | 0           | 0            | 0            |
|                                                                                                                       | <b># “Sometimes” (%)</b>           | 14 (3.87)   | 8 (3.31%)    | 6 (5.00%)    |
|                                                                                                                       | <b># “Often” (%)</b>               | 102 (28.18) | 68 (28.10%)  | 34 (28.33%)  |
|                                                                                                                       | <b># “Most of the time” (%)</b>    | 156 (43.09) | 99 (40.91%)  | 57 (47.50%)  |
|                                                                                                                       | <b># “All of the time” (%)</b>     | 90 (24.86)  | 67 (27.69%)  | 23 (19.17%)  |
| <b>How satisfied are you with the results of your surgery</b>                                                         | <b>N</b>                           | 360         | 241          | 119          |
|                                                                                                                       | <b>Very dissatisfied n (%)</b>     | 21(5.83)    | 14 (5.81%)   | 7 (5.88%)    |
|                                                                                                                       | <b>Somewhat dissatisfied n (%)</b> | 73 (20.28)  | 53 (21.99%)  | 20 (16.81%)  |
|                                                                                                                       | <b>Somewhat satisfied n (%)</b>    | 154 (42.78) | 95 (39.42%)  | 59 (49.58%)  |
|                                                                                                                       | <b>Very satisfied n (%)</b>        | 112 (31.11) | 79 (32.78%)  | 33 (27.73%)  |
| <b>How satisfied are you with the results of your surgery for improving your pain</b>                                 | <b>N</b>                           | 360         | 241          | 119          |
|                                                                                                                       | <b>Very dissatisfied n (%)</b>     | 47 (13.06)  | 35 (14.52%)  | 12 (10.08%)  |
|                                                                                                                       | <b>Somewhat dissatisfied n (%)</b> | 118 (32.78) | 77 (31.95%)  | 41 (34.45%)  |
|                                                                                                                       | <b>Somewhat satisfied n (%)</b>    | 139 (38.61) | 90 (37.34%)  | 49 (41.18%)  |
|                                                                                                                       | <b>Very satisfied n (%)</b>        | 56 (15.56)  | 39 (16.18%)  | 17 (14.29%)  |
| <b>How satisfied are you with the results of your surgery for improving your ability to do housework or gardening</b> | <b>N</b>                           | 359         | 241          | 118          |
|                                                                                                                       | <b>Very dissatisfied n (%)</b>     | 65 (18.11)  | 44 (18.26%)  | 21 (17.80%)  |
|                                                                                                                       | <b>Somewhat dissatisfied n (%)</b> | 152 (42.34) | 99 (41.08%)  | 53 (44.92%)  |
|                                                                                                                       | <b>Somewhat satisfied n (%)</b>    | 112 (31.20) | 77 (31.95%)  | 35 (29.66%)  |
|                                                                                                                       | <b>Very satisfied n (%)</b>        | 30 (8.36)   | 21 (8.71%)   | 9 (7.63%)    |
| <b>How satisfied are you with the results of your surgery for improving your ability to do leisure activities</b>     | <b>N</b>                           | 360         | 242          | 118          |
|                                                                                                                       | <b>Very dissatisfied n (%)</b>     | 86 (23.89)  | 56 (23.14%)  | 30 (25.42%)  |
|                                                                                                                       | <b>Somewhat dissatisfied n (%)</b> | 140 (38.89) | 94 (38.84%)  | 46 (38.98%)  |
|                                                                                                                       | <b>Somewhat satisfied n (%)</b>    | 107 (29.72) | 72 (29.75%)  | 35 (29.66%)  |
|                                                                                                                       | <b>Very satisfied n (%)</b>        | 27 (7.50)   | 20 (8.26%)   | 7 (5.93%)    |
| <b>Comparison of pain<sup>4</sup></b>                                                                                 | <b>N</b>                           | 362         | 242          | 120          |
|                                                                                                                       | <b># “Much Better” (%)</b>         | 79 (21.82)  | 51 (21.07%)  | 28 (23.33%)  |
|                                                                                                                       | <b># “A bit better” (%)</b>        | 70 (19.34)  | 47 (19.42%)  | 23 (19.17%)  |
|                                                                                                                       | <b># “The same” (%)</b>            | 54 (14.92)  | 37 (15.29%)  | 17 (14.17%)  |
|                                                                                                                       | <b># “A bit worse” (%)</b>         | 77 (21.27)  | 54 (22.31%)  | 23 (19.17%)  |
|                                                                                                                       | <b># “Much worse” (%)</b>          | 82 (22.65)  | 53 (21.90%)  | 29 (24.17%)  |
| <b>Body Map (CWP(M))</b>                                                                                              | <b>N</b>                           | 363         | 242          | 121          |

|                                                                                |                                                                        |                  |              |               |     |               |
|--------------------------------------------------------------------------------|------------------------------------------------------------------------|------------------|--------------|---------------|-----|---------------|
|                                                                                | # CWP(M) positive (%)                                                  | 16 (4.41)        | 11 (4.55%)   | 5 (4.13%)     |     |               |
|                                                                                | # CWP(M) negative (%)                                                  | 347 (95.59)      | 231 (95.45%) | 116 (95.87%)  |     |               |
| <b>Body Map</b>                                                                | <b>Zero painful regions reported</b>                                   | 101 (27.82)      | 62 (25.62%)  | 39 (32.23%)   |     |               |
|                                                                                | <b>Reported pain in replaced knee</b>                                  | 194 (53.44)      | 128 (52.89%) | 66 (54.55%)   |     |               |
|                                                                                | <b>Reported pain in ONLY replaced knee (no other regions selected)</b> | 23 (6.34)        | 14 (5.79%)   | 9 (7.44%)     |     |               |
|                                                                                | <b>Reported pain in one region (excl. replaced knee)</b>               | 68 (18.73)       | 49 (20.25%)  | 19 (15.70%)   |     |               |
|                                                                                | <b>Reported pain in two regions (excl. replaced knee)</b>              | 36 (9.92)        | 24 (9.92%)   | 12 (9.92%)    |     |               |
|                                                                                | <b>Reported pain in three regions (excl. replaced knee)</b>            | 48 (13.22)       | 34 (14.05%)  | 14 (11.57%)   |     |               |
|                                                                                | <b>Reported pain in four regions (excl. replaced knee)</b>             | 20 (5.51)        | 15 (6.20%)   | 5 (4.13%)     |     |               |
|                                                                                | <b>Reported pain in five or more region (excl. replaced knee)</b>      | 67 (18.46)       | 44 (18.18%)  | 23 (19.01%)   |     |               |
|                                                                                | <b>Outcome Measures</b>                                                |                  |              |               |     |               |
|                                                                                | N                                                                      | Mean (SD)        | N            | Mean (SD)     | N   | Mean (SD)     |
| <b>BPI Severity</b>                                                            | 363                                                                    | 5.24 (1.69)      | 242          | 5.28 (1.71)   | 121 | 5.15 (1.65)   |
| <b>BPI Interference</b>                                                        | 363                                                                    | 6.28 (1.91)      | 242          | 6.27 (1.91)   | 121 | 6.27 (1.93)   |
| <b>OKS</b>                                                                     | 363                                                                    | 18.23 (5.83)     | 242          | 18.04 (6.05)  | 121 | 18.61 (5.36)  |
| <b>OKS – Pain standardised subscale</b>                                        | 363                                                                    | 36.75 (12.70)    | 242          | 36.35 (12.97) | 121 | 37.53 (12.17) |
| <b>OKS – Function standardised subscale</b>                                    | 363                                                                    | 39.70 (14.28)    | 242          | 39.29 (14.63) | 121 | 40.50 (13.59) |
| <b>Pain Catastrophizing scale; N, median [IQR] due to distribution of data</b> | 360                                                                    | 18 [9.25, 30.50] | 240          | 19 [10,31]    | 120 | 17 [8, 29]    |
| <b>PCS: Rumination</b>                                                         | 360                                                                    | 7.92 (4.80)      | 240          | 8.25 (4.81)   | 120 | 7.26 (4.72)   |
| <b>PCS: Magnification</b>                                                      | 360                                                                    | 3.29 (3.20)      | 240          | 3.43 (3.26)   | 120 | 3.04 (3.07)   |
| <b>PCS: Helplessness</b>                                                       | 360                                                                    | 9.10 (6.17)      | 240          | 9.25 (6.34)   | 120 | 8.82 (5.84)   |
| <b>PaSol: Solving Pain</b>                                                     | 362                                                                    | 17.15 (5.83)     | 242          | 17.25 (5.58)  | 120 | 16.94 (6.33)  |
| <b>PaSol: Meaningful life</b>                                                  | 362                                                                    | 21.71 (5.97)     | 242          | 21.70 (5.86)  | 120 | 21.72 (6.20)  |
| <b>PaSol: Acceptance of pain</b>                                               | 358                                                                    | 7.89 (4.73)      | 241          | 8.00 (4.69)   | 117 | 7.65 (4.84)   |
| <b>PaSol: Belief in solution</b>                                               | 359                                                                    | 8.57 (3.21)      | 240          | 8.59 (3.16)   | 119 | 8.55 (3.05)   |
| <b>Patient Satisfaction</b>                                                    | 360                                                                    | 62.88 (18.99)    | 242          | 63.01 (19.61) | 118 | 62.61 (17.72) |
| <b>ICECAP-A</b>                                                                | 362                                                                    | 0.72 (0.20)      | 241          | 0.72 (0.2)    | 121 | 0.74 (0.21)   |
| <b>Short form-12 (physical)</b>                                                | 363                                                                    | 33.44 (6.51)     | 242          | 32.67 (6.50)  | 121 | 34.38 (6.44)  |
| <b>Short form-12 (mental)</b>                                                  | 363                                                                    | 42.19 (11.12)    | 242          | 42.18 (11.16) | 121 | 42.19 (11.08) |
|                                                                                |                                                                        |                  |              |               |     |               |
| <b>DN-4 raw score</b>                                                          | 359                                                                    | 3.79 (1.71)      | 240          | 3.81 (1.70)   | 119 | 3.74 (1.75)   |
| <b>PainDETECT raw score</b>                                                    | 363                                                                    | 18.19 (6.77)     | 242          | 18.51 (6.69)  | 121 | 17.55 (6.90)  |



**Table 3: Demographics and patients who did and did not complete screening**

|               | Screening at 10 weeks<br>N = 5036 |                | Screening at 12 weeks<br>N = 907 |                |
|---------------|-----------------------------------|----------------|----------------------------------|----------------|
|               | Responders                        | Non-responders | Responders                       | Non-responders |
| N (%)         | 3058 (61%)                        | 1977 (39%)     | 553 (61%)                        | 354 (39%)      |
| Mean age (SD) | 69.7 (8.8)                        | 69.9 (9.8)     | 67.7 (8.6)                       | 69.4 (10.4)    |
| % females     | 54.5%                             | 62.2%          | 56.2%                            | 62.0%          |

**Table 4: Baseline questionnaire completion by group**

|                                   | # questionnaires completed sufficiently to produce outcome measure |      |         |      |
|-----------------------------------|--------------------------------------------------------------------|------|---------|------|
|                                   | Intervention                                                       |      | Control |      |
|                                   | 242                                                                |      | 121     |      |
| Number of expected questionnaires | N                                                                  | %    | N       | %    |
| BPI Severity                      | 242                                                                | 100% | 121     | 100% |
| BPI Interference                  | 242                                                                | 100% | 121     | 100% |
| OKS                               | 242                                                                | 100% | 121     | 100% |
| PainDETECT                        | 242                                                                | 100% | 121     | 100% |
| DN-4                              | 240                                                                | 99%  | 119     | 98%  |
| Patient Satisfaction              | 242                                                                | 100% | 118     | 98%  |
| Short form-12 physical            | 242                                                                | 100% | 121     | 100% |
| Short form-12 mental              | 242                                                                | 100% | 121     | 100% |
| HADS anxiety                      | 242                                                                | 100% | 121     | 100% |
| HADS depression                   | 242                                                                | 100% | 121     | 100% |
| ICECAP-A                          | 241                                                                | 100% | 121     | 100% |
| Pain Catastrophizing scale        | 240                                                                | 99%  | 121     | 100% |
| PaSol solve                       | 242                                                                | 100% | 120     | 99%  |
| PaSol meaning                     | 242                                                                | 100% | 120     | 99%  |
| PaSol accept                      | 241                                                                | 100% | 117     | 97%  |
| PaSol belief                      | 240                                                                | 99%  | 119     | 98%  |
| Body Map (CWP(M))                 | 242                                                                | 100% | 121     | 100% |

**Table 5: 6 month questionnaire completion by group**

|                                   | # questionnaires completed sufficiently to produce outcome measure |     |         |     |
|-----------------------------------|--------------------------------------------------------------------|-----|---------|-----|
|                                   | Intervention                                                       |     | Control |     |
|                                   | 232                                                                |     | 116     |     |
| Number of expected questionnaires | N                                                                  | %   | N       | %   |
| BPI Severity                      | 213                                                                | 92% | 101     | 87% |
| BPI Interference                  | 213                                                                | 92% | 102     | 88% |
| OKS                               | 209                                                                | 90% | 99      | 85% |
| PainDETECT                        | 209                                                                | 90% | 100     | 86% |
| DN-4                              | 202                                                                | 87% | 96      | 83% |
| Patient Satisfaction              | 206                                                                | 89% | 96      | 83% |
| Short form-12 physical            | 209                                                                | 90% | 100     | 86% |
| Short form-12 mental              | 209                                                                | 90% | 98      | 84% |
| HADS anxiety                      | 206                                                                | 89% | 99      | 85% |

|                            |     |     |     |     |
|----------------------------|-----|-----|-----|-----|
| HADS depression            | 206 | 89% | 98  | 84% |
| ICECAP-A                   | 206 | 89% | 99  | 85% |
| Pain Catastrophizing scale | 201 | 87% | 96  | 83% |
| PaSol solve                | 204 | 88% | 95  | 82% |
| PaSol meaning              | 204 | 88% | 96  | 83% |
| PaSol accept               | 203 | 88% | 93  | 80% |
| PaSol belief               | 202 | 87% | 96  | 83% |
| Body Map (CWP(M))          | 215 | 93% | 104 | 90% |

**Table 6: 12 month questionnaire completion by group**

|                                   | # questionnaires completed sufficiently to produce outcome measure |     |         |     |
|-----------------------------------|--------------------------------------------------------------------|-----|---------|-----|
|                                   | Intervention                                                       |     | Control |     |
|                                   | 226                                                                |     | 111     |     |
| Number of expected questionnaires | N                                                                  | %   | N       | %   |
| BPI Severity                      | 212                                                                | 94% | 100     | 90% |
| BPI Interference                  | 213                                                                | 94% | 100     | 90% |
| OKS                               | 201                                                                | 89% | 93      | 84% |
| PainDETECT                        | 198                                                                | 88% | 94      | 85% |
| DN-4                              | 195                                                                | 86% | 94      | 85% |
| Patient Satisfaction              | 197                                                                | 87% | 89      | 80% |
| Short form-12 physical            | 195                                                                | 86% | 93      | 84% |
| Short form-12 mental              | 195                                                                | 86% | 93      | 84% |
| HADS anxiety                      | 198                                                                | 88% | 92      | 83% |
| HADS depression                   | 197                                                                | 87% | 90      | 81% |
| ICECAP-A                          | 197                                                                | 87% | 91      | 82% |
| Pain Catastrophizing scale        | 195                                                                | 86% | 91      | 82% |
| PaSol solve                       | 193                                                                | 85% | 89      | 80% |
| PaSol meaning                     | 193                                                                | 85% | 90      | 81% |
| PaSol accept                      | 191                                                                | 85% | 87      | 78% |
| PaSol belief                      | 193                                                                | 85% | 90      | 81% |
| Body Map (CWP(M))                 | 213                                                                | 94% | 100     | 90% |

**Table 7: Withdrawal summary by group**

|                     | # patients randomised | # withdrawals before or at the 6 months follow-up | # withdrawals after 6 month follow-up | Total withdrawals post-randomisation |
|---------------------|-----------------------|---------------------------------------------------|---------------------------------------|--------------------------------------|
| <b>Intervention</b> | 242                   | 9                                                 | 6                                     | 15 (6%)                              |
| <b>Control</b>      | 121                   | 5                                                 | 3                                     | 8 (7%)                               |
| <b>Overall</b>      | 363                   | 14                                                | 9                                     | 23 (6%)                              |

**Table 8: Reasons for withdrawal**

|                     | # withdrawals | Reason for withdrawal                             |
|---------------------|---------------|---------------------------------------------------|
| <b>Intervention</b> | 9             | Patient did not want to be part of the trial      |
|                     | 2             | New health problems                               |
|                     | 1             | Patient became uncontactable                      |
|                     | 1             | Involved in a conflicting trial                   |
|                     | 1             | Surgeon advised to withdraw                       |
|                     | 1             | Incorrect screening – patient did not have TKR    |
| <b>Control</b>      | 4             | Patient did not want to be part of the trial      |
|                     | 2             | Unhappy with care                                 |
|                     | 1             | Patient became uncontactable                      |
|                     | 1             | Patient did not think they were part of the trial |

**Table 9: Number of follow up calls received**

| Number of calls (X) | Number of patients to receive maximum of X number of calls |
|---------------------|------------------------------------------------------------|
| 0                   | 17 (7%)                                                    |
| 1                   | 37 (15%)                                                   |
| 2                   | 35 (14%)                                                   |
| 3                   | 67 (28%)                                                   |
| 4                   | 30 (12%)                                                   |
| 5                   | 27 (11%)                                                   |
| 6                   | 29 (12%)                                                   |

**Table 10: Timings of follow up calls received**

|                      | Weeks to call from recruitment median [IQR] |
|----------------------|---------------------------------------------|
| 1 <sup>st</sup> call | 11 [9, 14]                                  |
| 2 <sup>nd</sup> call | 18 [16, 23]                                 |
| 3 <sup>rd</sup> call | 28 [23, 35]                                 |
| 4 <sup>th</sup> call | 31 [28, 39]                                 |
| 5 <sup>th</sup> call | 37 [34, 43]                                 |
| 6 <sup>th</sup> call | 43 [39, 48]                                 |

**Table 11: Protocol deviations**

| Protocol deviation detail (post randomisation)                           | Site  | Group        | No participants affected |
|--------------------------------------------------------------------------|-------|--------------|--------------------------|
| Follow-up calls not completed as per protocol                            | Site5 | Intervention | 23                       |
| Outside window for intervention delivery                                 | Site8 | Intervention | 10                       |
| Non-referral, HADS indications, reasons not documented                   | Site4 | Intervention | 5                        |
| Non-referral, neuropathic pain indication, reasons not documented        | Site4 | Intervention | 4                        |
| Participant declined to attend intervention                              | Site8 | Intervention | 4                        |
| Outside window for intervention delivery                                 | Site3 | Intervention | 2                        |
| Outside window for intervention delivery                                 | Site4 | Intervention | 2                        |
| Data collected after trial closure                                       | Site5 | Intervention | 1                        |
| Met exclusion criteria - withdrawn                                       | Site5 | Intervention | 1                        |
| Operating surgeon made unannounced contribution to assessment            | Site2 | Intervention | 1                        |
| Outside window for intervention delivery                                 | Site1 | Intervention | 1                        |
| Participant declined to attend intervention                              | Site5 | Intervention | 1                        |
| Referral to GP for anxiety and depression not discussed with participant | Site2 | Intervention | 1                        |

**Table 12: Summary statistics at 6 months and 12 months**

| N                                    | 6 months |               | 12 months |               |
|--------------------------------------|----------|---------------|-----------|---------------|
|                                      | N        | Mean (SD)     | N         | Mean (SD)     |
|                                      | 332      |               | 313       |               |
| BPI Severity                         | 314      | 3.71 (2.37)   | 312       | 3.31 (2.47)   |
| BPI Interference                     | 315      | 4.15 (2.66)   | 313       | 3.70 (2.83)   |
| OKS                                  | 308      | 25.72 (9.28)  | 294       | 28.03 (10.07) |
| OKS – Pain standardised subscale     | 308      | 54.06 (20.57) | 294       | 59.71 (22.52) |
| OKS – Function standardised subscale | 309      | 52.86 (19.85) | 295       | 56.45 (20.99) |
| Pain Catastrophizing scale           | 297      | 9 (3, 22)     | 286       | 8 (1, 21)     |

|                                                               |                             |               |              |               |
|---------------------------------------------------------------|-----------------------------|---------------|--------------|---------------|
| <b>PCS: Rumination</b>                                        | 298                         | 5.03 (4.90)   | 287          | 4.56 (4.78)   |
| <b>PCS: Magnification</b>                                     | 298                         | 2.38 (2.72)   | 286          | 2.33 (2.79)   |
| <b>PCS: Helplessness</b>                                      | 297                         | 6.12 (6.02)   | 287          | 5.66 (6.20)   |
| <b>PaSol: Solving Pain</b>                                    | 299                         | 13.84 (7.61)  | 282          | 12.85 (8.04)  |
| <b>PaSol: Meaningful life</b>                                 | 300                         | 20.19 (7.95)  | 283          | 19.39 (8.71)  |
| <b>PaSol: Acceptance of pain</b>                              | 296                         | 8.84 (5.34)   | 278          | 8.55 (5.68)   |
| <b>PaSol: Belief in solution</b>                              | 298                         | 6.73 (3.87)   | 283          | 5.80 (4.34)   |
| <b>Patient Satisfaction</b>                                   | 302                         | 68.54 (21.85) | 286          | 70.36 (22.92) |
| <b>ICECAP-A</b>                                               | 305                         | 0.77 (0.20)   | 288          | 0.78 (0.20)   |
| <b>Short form-12 (physical)</b>                               | 309                         | 36.44 (8.11)  | 288          | 37.46 (9.78)  |
| <b>Short form-12 (mental)</b>                                 | 307                         | 47.04 (11.53) | 288          | 48.23 (11.09) |
| <b>EQ-5D-5L</b>                                               | 313                         | 0.54 (0.24)   | 310          | 0.56 (0.25)   |
| <b>DN-4 raw score</b>                                         | 298                         | 3.38 (1.89)   | 289          | 3.03 (2.09)   |
| <b>PainDETECT raw score</b>                                   | 309                         | 13.97 (6.97)  | 292          | 12.81 (7.63)  |
| <b>DN-4 (Neuropathic pain?)</b>                               |                             | 298           | 289          |               |
|                                                               | N                           |               |              |               |
|                                                               | Yes; N (%)                  | 192 (64.43%)  | 164 (56.75%) |               |
|                                                               | No; N (%)                   | 106 (35.57%)  | 125 (43.25%) |               |
| <b>PainDETECT (Neuropathic pain?)</b>                         |                             | 309           | 292          |               |
|                                                               | N                           |               |              |               |
|                                                               | Unlikely; N (%)             | 131 (42.39%)  | 157 (53.77%) |               |
|                                                               | Ambiguous; N (%)            | 90 (29.13%)   | 62 (21.23%)  |               |
|                                                               | Likely; N (%)               | 88 (28.48%)   | 73 (25.00%)  |               |
| <b>HADS: Anxiety</b>                                          |                             | 305           | 290          |               |
|                                                               | N                           |               |              |               |
|                                                               | Number of "Normal" (%)      | 198 (64.92%)  | 184 (63.45%) |               |
|                                                               | # "Borderline" (%)          | 43 (14.10%)   | 53 (18.28%)  |               |
|                                                               | # "Clinical" (%)            | 64 (20.98%)   | 53 (18.28%)  |               |
| <b>HADS: Depression</b>                                       |                             | 304           | 287          |               |
|                                                               | N                           |               |              |               |
|                                                               | Number of "Normal" (%)      | 183 (60.20%)  | 182 (63.41%) |               |
|                                                               | # "Borderline" (%)          | 71 (23.36%)   | 70 (24.39%)  |               |
|                                                               | # "Clinical" (%)            | 50 (16.45%)   | 35 (12.20%)  |               |
| <b>Frequency of pain Q1<sup>2</sup></b>                       |                             | 315           | 313          |               |
|                                                               | N                           |               |              |               |
|                                                               | # "Rarely" (%)              | 49 (15.56%)   | 76 (24.28%)  |               |
|                                                               | # "Sometimes" (%)           | 88 (27.94%)   | 91 (29.07%)  |               |
|                                                               | # "Often" (%)               | 72 (22.86%)   | 61 (19.49%)  |               |
|                                                               | # "Most of the time" (%)    | 72 (22.86%)   | 53 (16.93%)  |               |
|                                                               | # "All of the time" (%)     | 34 (10.79%)   | 32 (10.22%)  |               |
| <b>Frequency of pain Q2<sup>3</sup></b>                       |                             | 309           | 291          |               |
|                                                               | N                           |               |              |               |
|                                                               | # "Rarely" (%)              | 30 (9.71%)    | 61 (20.96%)  |               |
|                                                               | # "Sometimes" (%)           | 98 (31.72%)   | 76 (26.12%)  |               |
|                                                               | # "Often" (%)               | 64 (20.71%)   | 65 (22.34%)  |               |
|                                                               | # "Most of the time" (%)    | 83 (26.86%)   | 62 (21.31%)  |               |
|                                                               | # "All of the time" (%)     | 34 (11.00%)   | 27 (9.28%)   |               |
| <b>How satisfied are you with the results of your surgery</b> |                             | 304           | 289          |               |
|                                                               | N                           |               |              |               |
|                                                               | Very dissatisfied n (%)     | 96 (31.58%)   | 27 (9.34%)   |               |
|                                                               | Somewhat dissatisfied n (%) | 124 (40.79%)  | 52 (17.99%)  |               |

|                                                                                                                |                                                                 |              |              |
|----------------------------------------------------------------------------------------------------------------|-----------------------------------------------------------------|--------------|--------------|
|                                                                                                                | Somewhat satisfied n (%)                                        | 63 (20.72%)  | 65 (32.87%)  |
|                                                                                                                | Very satisfied n (%)                                            | 21 (6.91%)   | 115 (39.79%) |
| How satisfied are you with the results of your surgery for improving your pain                                 | N                                                               | 304          | 288          |
|                                                                                                                | Very dissatisfied n (%)                                         | 98 (32.24%)  | 36 (12.50%)  |
|                                                                                                                | Somewhat dissatisfied n (%)                                     | 101 (33.22%) | 48 (16.67%)  |
|                                                                                                                | Somewhat satisfied n (%)                                        | 74 (24.34%)  | 87 (30.21%)  |
|                                                                                                                | Very satisfied n (%)                                            | 31 (10.20%)  | 117 (40.63%) |
| How satisfied are you with the results of your surgery for improving your ability to do housework or gardening | N                                                               | 302          | 286          |
|                                                                                                                | Very dissatisfied n (%)                                         | 65 (21.52%)  | 42 (14.69%)  |
|                                                                                                                | Somewhat dissatisfied n (%)                                     | 93 (30.79%)  | 82 (28.67%)  |
|                                                                                                                | Somewhat satisfied n (%)                                        | 98 (32.45%)  | 99 (34.62%)  |
|                                                                                                                | Very satisfied n (%)                                            | 46 (15.23%)  | 63 (22.03%)  |
| How satisfied are you with the results of your surgery for improving your ability to do leisure activities     | N                                                               | 301          | 285          |
|                                                                                                                | Very dissatisfied n (%)                                         | 60 (19.93%)  | 49 (17.19%)  |
|                                                                                                                | Somewhat dissatisfied n (%)                                     | 89 (29.57%)  | 78 (27.37%)  |
|                                                                                                                | Somewhat satisfied n (%)                                        | 103 (34.22%) | 99 (34.74%)  |
|                                                                                                                | Very satisfied n (%)                                            | 49 (16.28%)  | 59 (20.70%)  |
| Comparison of pain <sup>4</sup>                                                                                | N                                                               | 304          | 289          |
|                                                                                                                | # "Much Better" (%)                                             | 141 (46.38%) | 155 (53.63%) |
|                                                                                                                | # "A bit better" (%)                                            | 63 (20.72%)  | 60 (20.76%)  |
|                                                                                                                | # "The same" (%)                                                | 41 (13.49%)  | 26 (9.00%)   |
|                                                                                                                | # "A bit worse" (%)                                             | 27 (8.88%)   | 27 (9.34%)   |
|                                                                                                                | # "Much worse" (%)                                              | 32 (10.53%)  | 21 (7.27%)   |
| Body Map (CWP(M))                                                                                              | N                                                               | 332          | 313          |
|                                                                                                                | # CWP(M) positive (%)                                           | 12 (3.61%)   | 16 (5.11%)   |
|                                                                                                                | # CWP(M) negative (%)                                           | 320 (96.97%) | 297 (94.89%) |
| Body Map                                                                                                       | Zero painful regions reported                                   | 110 (33.13%) | 105 (33.55%) |
|                                                                                                                | Reported pain in replaced knee                                  | 128 (38.55%) | 126 (40.26%) |
|                                                                                                                | Reported pain in ONLY replaced knee (no other regions selected) | 17 (5.12%)   | 17 (5.43%)   |
|                                                                                                                | Reported pain in one region (excl. replaced knee)               | 51 (15.36%)  | 46 (14.70%)  |
|                                                                                                                | Reported pain in two regions (excl. replaced knee)              | 41 (12.35%)  | 31 (9.90%)   |
|                                                                                                                | Reported pain in three regions (excl. replaced knee)            | 33 (9.94%)   | 31 (9.90%)   |
|                                                                                                                | Reported pain in four regions (excl. replaced knee)             | 12 (3.61%)   | 14 (4.47%)   |
|                                                                                                                | Reported pain in five or more region (excl. replaced knee)      | 68 (20.48%)  | 69 (22.04%)  |

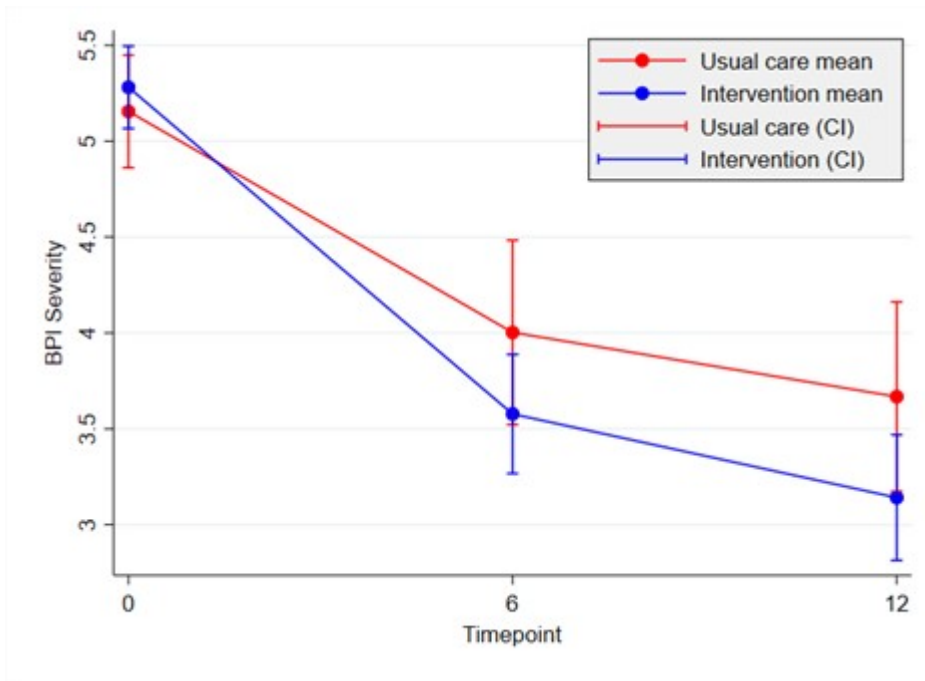

Figure 1: Unadjusted mean BPI severity score with confidence intervals at baseline and follow-up

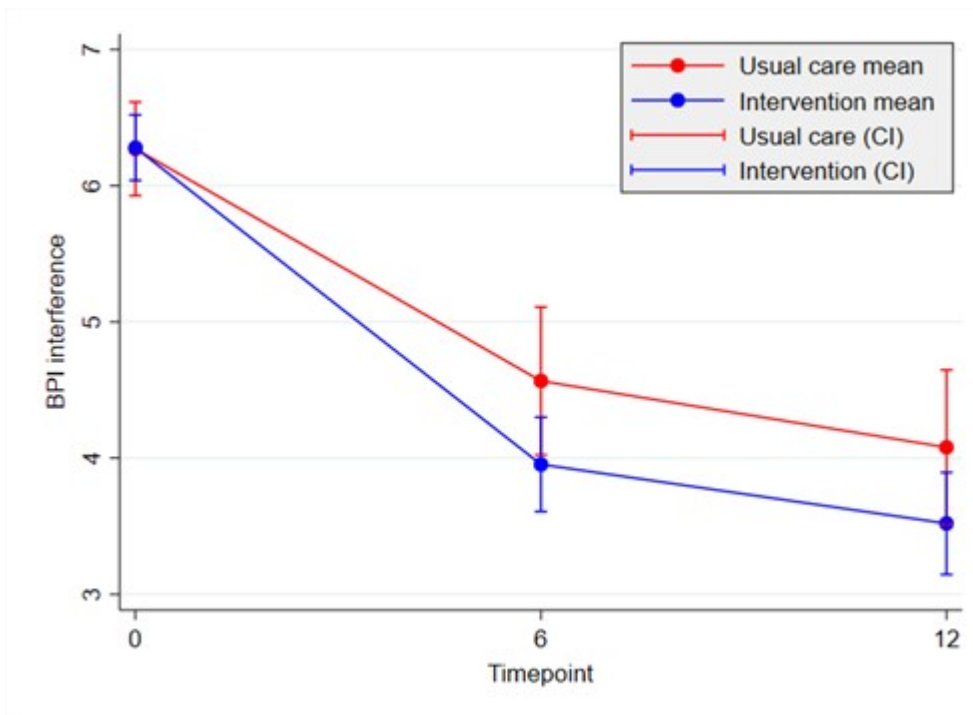

Figure 2: Unadjusted mean BPI interference score with confidence intervals at baseline and follow-up

**Table 13: Secondary analysis – adjusting for ‘time to follow up from recruitment’**

|                         | Difference in means <sup>1</sup> | 95% CI         | P-value |
|-------------------------|----------------------------------|----------------|---------|
| <b>BPI Severity</b>     | -0.65                            | (-1.17, -0.13) | 0.015   |
| <b>BPI Interference</b> | -0.68                            | (-1.28, -0.08) | 0.028   |

<sup>1</sup> Adjusted for trial centre and baseline BPI subscores and ‘time to follow up’

**Sensitivity analysis for primary endpoint**

Comparison of results of ‘as randomised’ analysis of complete cases with ‘as randomised’ analysis where missing data were imputed using “best” and “worst” case scenarios and the method of mice for primary outcome of **BPI Severity Score**.

**Table 14: Sensitivity analysis for missing data**

|                              | N   | Difference in means <sup>a</sup> | 95% CI         | p-value |
|------------------------------|-----|----------------------------------|----------------|---------|
| <b>Complete case</b>         | 312 | -0.65                            | (-1.17, -0.13) | 0.014   |
| <b>“Best” case scenario</b>  | 363 | -0.36                            | (-0.88, 0.17)  | 0.186   |
| <b>“Worst” case scenario</b> | 363 | -0.85                            | (-1.51, -0.20) | 0.011   |
| <b>mice</b>                  | 363 | -0.60                            | (-1.14, -0.06) | 0.030   |

<sup>a</sup> Adjusted for trial centre and for baseline BPI subscores

Comparison of results of ‘as randomised’ analysis of complete cases with ‘as randomised’ analysis where missing data were imputed using “best” and “worst” case scenarios and the method of mice for primary outcome of **BPI Interference Score**.

**Table 15: Sensitivity analysis for missing data**

|                              | N   | Difference in means <sup>a</sup> | 95% CI         | p-value |
|------------------------------|-----|----------------------------------|----------------|---------|
| <b>Complete case</b>         | 313 | -0.68                            | (-1.28, -0.08) | 0.026   |
| <b>“Best” case scenario</b>  | 363 | -0.33                            | (-0.94, 0.27)  | 0.278   |
| <b>“Worst” case scenario</b> | 363 | -0.87                            | (-1.55, -0.19) | 0.013   |
| <b>mice</b>                  | 363 | -0.57                            | (-1.19, 0.05)  | 0.073   |

<sup>a</sup> Adjusted for trial centre and for baseline BPI subscores

**Sensitivity analysis – Overlap of patient sample with other interventional trials**

Comparison of results of ‘as randomised’ analysis of all cases with ‘as randomised’ analysis where only patients involved in STAR are analysed for primary outcome of BPI Severity scale.

**Table 16: Overlap sensitivity analysis for BPI Severity scale**

|                                                     | N   | Difference in means <sup>a</sup> | 95% CI         | p-value |
|-----------------------------------------------------|-----|----------------------------------|----------------|---------|
| Overall ‘as randomised’ analysis                    | 312 | -0.65                            | (-1.17, -0.13) | 0.014   |
| Excluding patients in similar interventional trials | 308 | -0.65                            | (-1.17, -0.14) | 0.014   |

<sup>a</sup> Adjusted for trial centre and for baseline BPI subscores

**Per protocol and CACE analysis – primary outcomes**

- 9 intervention patients did not have an assessment clinic.  $9/363 = 97.52\%$  and so CACE is not necessary according to section 6.4 Compliance of the SAP.

Comparison of results of ‘as randomised’ analysis of complete cases with per protocol analysis and CACE analysis for primary outcome of **BPI Severity Score**.

**Table 17: Sensitivity analysis for missing data**

|                     | N   | Difference in means <sup>a</sup> | 95% CI         | p-value |
|---------------------|-----|----------------------------------|----------------|---------|
| ‘as randomised’     | 312 | -0.65                            | (-1.17, -0.13) | 0.014   |
| <b>Per protocol</b> | 308 | -0.67                            | (-1.19, -0.15) | 0.011   |

<sup>a</sup> Adjusted for trial centre and for baseline BPI subscores

Comparison of results of ‘as randomised’ analysis of complete cases with per protocol analysis and CACE for primary outcome of **BPI Interference Score**.

**Table 18: Sensitivity analysis for missing data**

|                     | N   | Difference in means <sup>a</sup> | 95% CI         | p-value |
|---------------------|-----|----------------------------------|----------------|---------|
| ‘as randomised’     | 313 | -0.68                            | (-1.28, -0.08) | 0.026   |
| <b>Per protocol</b> | 309 | -0.71                            | (-1.31, -0.10) | 0.022   |

<sup>a</sup> Adjusted for trial centre and for baseline BPI subscores

**Sensitivity analysis – time between TKR operation and assessment clinic**

- The median (IQR) number of months between TKR operation and assessment clinic is 3.61 (3.32, 4.01). 19 (8%) intervention patients had their assessment clinic within 3 months of the TKR operation. 172 (72%) intervention patients had their assessment clinic within 4 months of the TKR operation.

**Table 19: Sensitivity analysis excluding patients who had their assessment after 4 months post-operative**

|                                  | Excluding those patients who had their assessment after 4 months post-operative |                     |                |         |
|----------------------------------|---------------------------------------------------------------------------------|---------------------|----------------|---------|
|                                  | N                                                                               | Difference in means | 95% CI         | P-value |
| <b>BPI Pain subscale</b>         | 255                                                                             | -0.67               | (-1.23, -0.11) | 0.019   |
| <b>BPI Interference subscale</b> | 256                                                                             | -0.76               | (-1.41, -0.11) | 0.023   |

**Repeated measures analysis**

**Table 20: Repeated measures analysis of BPI subscales**

|                                  | 6 months            |                |         | 12 months           |                |         | P-value of interaction |
|----------------------------------|---------------------|----------------|---------|---------------------|----------------|---------|------------------------|
|                                  | Difference in means | 95% CI         | P-value | Difference in means | 95% CI         | P-value |                        |
| <b>BPI Pain subscale</b>         | -0.55               | (-1.05, -0.06) | 0.028   | -0.62               | (-1.11, -0.13) | 0.014   | 0.746                  |
| <b>BPI Interference subscale</b> | -0.71               | (-1.28, -0.15) | 0.014   | -0.61               | (-1.18, -0.04) | 0.034   | 0.708                  |

\*adjusted for: trial centre and baseline BPI subscores

**Subgroup analyses**

**Table 21: Evidence of interaction**

| Subgroup variable           | Outcome          | p-value of interaction |
|-----------------------------|------------------|------------------------|
| Trial Centre                | BPI severity     | 0.287                  |
|                             | BPI Interference | 0.154                  |
| OKS continuous              | BPI severity     | 0.022                  |
|                             | BPI Interference | 0.002                  |
| OKS categorical             | BPI severity     | 0.365                  |
|                             | BPI Interference | 0.521                  |
| PaSol composite continuous  | BPI severity     | 0.680                  |
|                             | BPI Interference | 0.647                  |
| PaSol composite categorical | BPI severity     | 0.533                  |
|                             | BPI Interference | 0.234                  |



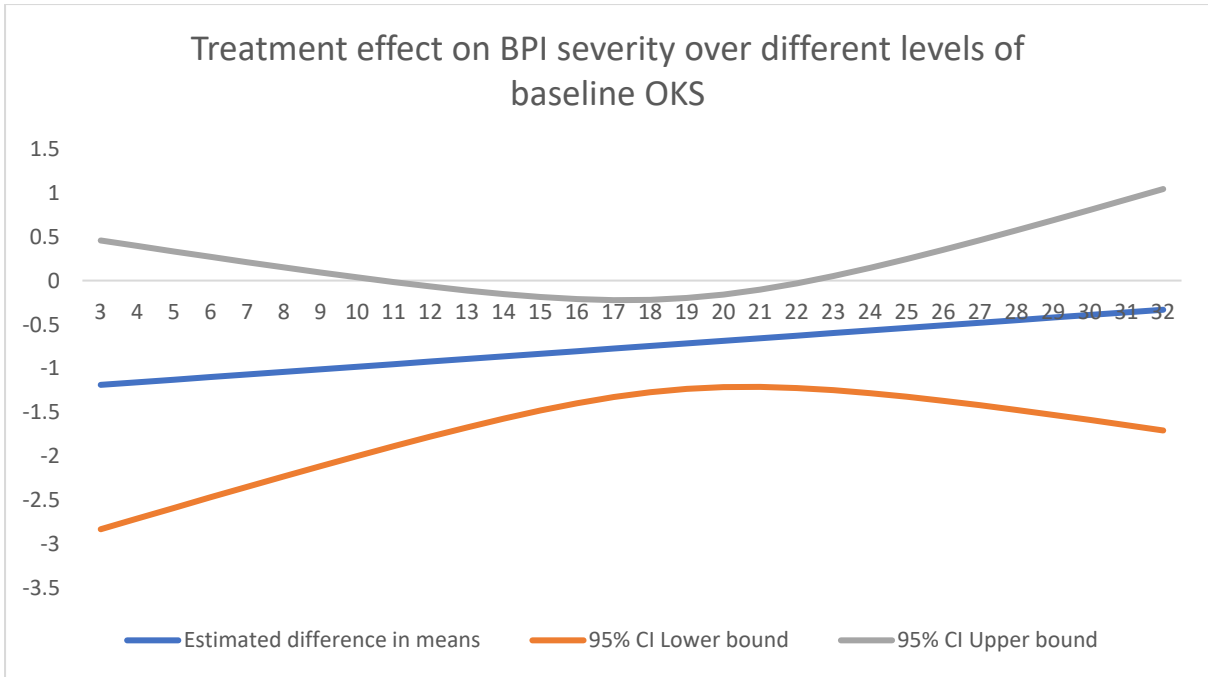

**Figure 3: Treatment effect on BPI severity over differing levels of OKS (continuous) at baseline**

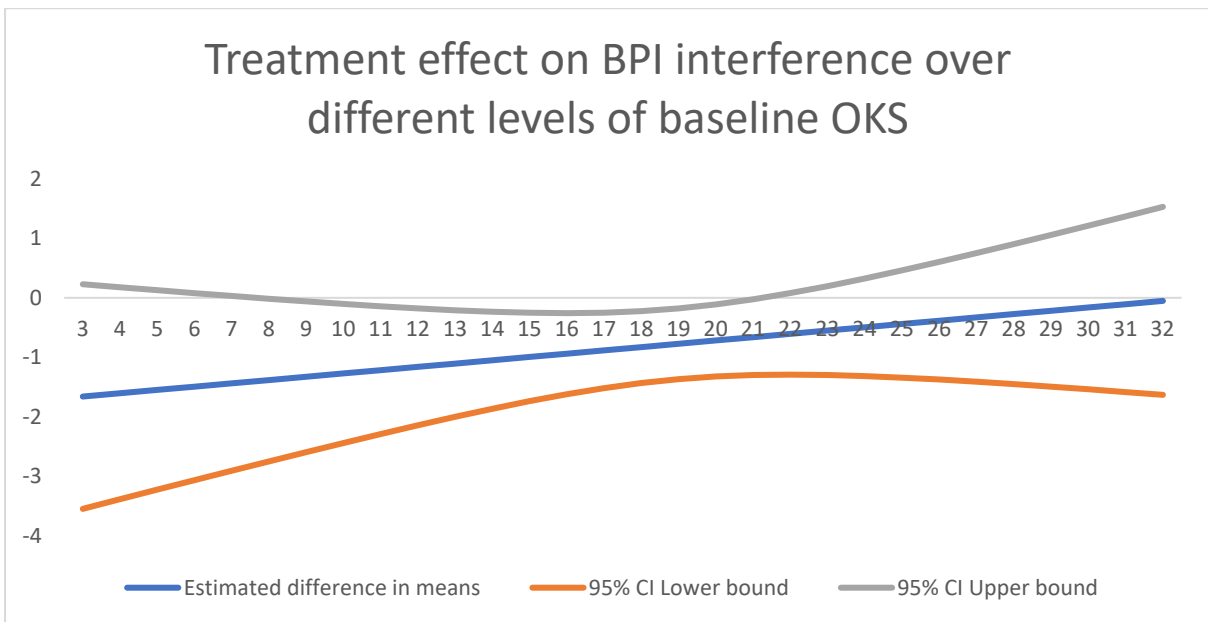

**Figure 4: Treatment effect on BPI interference over differing levels of OKS (continuous) at baseline**

**Table 22: Subgroup analysis of OKS categories**

| Outcome                          | OKS category    | N   | Difference in means | 95% CI         |
|----------------------------------|-----------------|-----|---------------------|----------------|
| <b>BPI Pain subscale</b>         | Severe          | 171 | -1.00               | (-1.70, -0.29) |
|                                  | Moderate        | 134 | -0.19               | (-0.97, 0.60)  |
|                                  | Mild - moderate | 7   | -1.49               | (-5.09, 2.11)  |
| <b>BPI Interference subscale</b> | Severe          | 172 | -1.09               | (-1.91, -0.27) |
|                                  | Moderate        | 134 | -0.18               | (-1.09, 0.73)  |
|                                  | Mild - moderate | 7   | -0.53               | (-4.71, 3.66)  |

**Accounting for potential impact of COVID-19****Table 23: Accounting for potential impact of COVID-19: Psychological outcomes**

|                        | Baseline                                  |              |                                                |              | 12 months                                 |              |                                                |               | Difference (12 month outcome – baseline outcome) |              |                                                |                  |
|------------------------|-------------------------------------------|--------------|------------------------------------------------|--------------|-------------------------------------------|--------------|------------------------------------------------|---------------|--------------------------------------------------|--------------|------------------------------------------------|------------------|
|                        | 12 month completion before the 23/03/2020 |              | 12 month completion on or after the 23/03/2020 |              | 12 month completion before the 23/03/2020 |              | 12 month completion on or after the 23/03/2020 |               | 12 month completion before the 23/03/2020        |              | 12 month completion on or after the 23/03/2020 |                  |
|                        | N                                         | Median (IQR) | N                                              | Median (IQR) | N                                         | Median (IQR) | N                                              | Median (IQR)  | N                                                | Median (IQR) | N                                              | Median (IQR)     |
| <b>HADS anxiety</b>    | 274                                       | 7 (4, 11)    | 39                                             | 7 (3, 10)    | 254                                       | 6 (2, 9)     | 36                                             | 6 (2, 10)     | 254                                              | -1 (-3, 1)   | 36                                             | -1 (-2, 1)       |
| <b>HADS depression</b> | 274                                       | 7.5 (5, 10)  | 39                                             | 6 (3, 10)    | 252                                       | 5.5 (3, 9)   | 35                                             | 6 (2, 8)      | 252                                              | -2 (-3.5, 1) | 35                                             | -2 (-3, 0)       |
| <b>PaSol Solve</b>     | 274                                       | 18 (13, 22)  | 39                                             | 18 (12, 20)  | 246                                       | 15 (6, 24)   | 36                                             | 13.5 (1, 20)  | 246                                              | -3 (-9, 1)   | 36                                             | -3 (-12, 3)      |
| <b>PaSol meaning</b>   | 274                                       | 23 (18, 27)  | 39                                             | 22 (17, 24)  | 247                                       | 21 (15, 27)  | 36                                             | 18 (13.5, 22) | 247                                              | 0 (-7, 3)    | 36                                             | -1 (-8.5, 2.5)   |
| <b>PaSol accept</b>    | 272                                       | 7 (4, 11)    | 39                                             | 8 (5, 12)    | 242                                       | 9 (5, 13)    | 36                                             | 7 (1, 13)     | 240                                              | 1 (-3, 5)    | 36                                             | -0.5 (-3.5, 2.5) |
| <b>PaSol Belief</b>    | 271                                       | 9 (6, 12)    | 39                                             | 8 (6, 11)    | 247                                       | 6 (1, 10)    | 36                                             | 4 (0, 8.5)    | 245                                              | -2 (-6, 0)   | 36                                             | -3 (-6, 0.5)     |

**Secondary outcomes****Table 24: OKS sensitivity analysis: missing data**

|                              | N   | Difference in means <sup>a</sup> | 95% CI        | p-value |
|------------------------------|-----|----------------------------------|---------------|---------|
| <b>Complete case</b>         | 294 | 2.68                             | (0.58, 4.78)  | 0.013   |
| <b>“Best” case scenario</b>  | 363 | 0.21                             | (-2.33, 2.75) | 0.871   |
| <b>“Worst” case scenario</b> | 363 | 3.36                             | (0.56, 6.16)  | 0.019   |
| <b>mice</b>                  | 363 | 2.16                             | (0.07, 4.24)  | 0.042   |

<sup>a</sup> Adjusted for trial centre and for baseline BPI subscores and baseline OKS

**Table 25: OKS sensitivity analysis: per protocol**

|                     | N   | Difference in means <sup>a</sup> | 95% CI       | p-value |
|---------------------|-----|----------------------------------|--------------|---------|
| 'as randomised'     | 294 | 2.68                             | (0.58, 4.78) | 0.013   |
| <b>Per protocol</b> | 290 | 2.72                             | (0.60, 4.84) | 0.012   |

<sup>a</sup> Adjusted for trial centre and for baseline BPI subscores

**Table 26: DN-4 sensitivity analysis: missing data**

|                              | N   | Difference in means <sup>a</sup> | 95% CI        | p-value |
|------------------------------|-----|----------------------------------|---------------|---------|
| <b>Complete case</b>         | 286 | -0.10                            | (-0.55, 0.35) | 0.653   |
| <b>"Best" case scenario</b>  | 359 | 0.12                             | (-1.34, 0.59) | 0.606   |
| <b>"Worst" case scenario</b> | 359 | -0.13                            | (-0.62, 0.36) | 0.607   |
| <b>mice</b>                  | 359 | -0.05                            | (-0.52, 0.42) | 0.840   |

<sup>a</sup> Adjusted for trial centre and for baseline BPI subscores and baseline DN-4

**Table 27: DN-4 sensitivity analysis: per protocol**

|                     | N   | Difference in means <sup>a</sup> | 95% CI        | p-value |
|---------------------|-----|----------------------------------|---------------|---------|
| 'as randomised'     | 286 | -0.10                            | (-0.55, 0.35) | 0.653   |
| <b>Per protocol</b> | 282 | -0.11                            | (-0.56, 0.35) | 0.644   |

<sup>a</sup> Adjusted for trial centre and for baseline BPI subscores

**Table 28: PainDETECT sensitivity analysis: missing data**

|                              | N   | Difference in means <sup>a</sup> | 95% CI        | p-value |
|------------------------------|-----|----------------------------------|---------------|---------|
| <b>Complete case</b>         | 292 | -0.93                            | (-2.51, 0.65) | 0.249   |
| <b>"Best" case scenario</b>  | 363 | 0.30                             | (-1.55, 2.14) | 0.753   |
| <b>"Worst" case scenario</b> | 363 | -1.49                            | (-3.92, 0.94) | 0.228   |
| <b>mice</b>                  | 363 | -0.77                            | (-2.33, 0.80) | 0.335   |

<sup>a</sup> Adjusted for trial centre and for baseline BPI subscores and baseline PainDETECT

**Table 29: PainDETECT sensitivity analysis: per protocol**

|                     | N   | Difference in means <sup>a</sup> | 95% CI        | p-value |
|---------------------|-----|----------------------------------|---------------|---------|
| 'as randomised'     | 292 | -0.93                            | (-2.51, 0.65) | 0.249   |
| <b>Per protocol</b> | 288 | -1.03                            | (-2.62, 0.56) | 0.204   |

<sup>a</sup> Adjusted for trial centre and for baseline BPI subscores

**Table 30: PCS sensitivity analysis: missing data**

|                              | N   | Difference in means <sup>a</sup> | 95% CI       | p-value |
|------------------------------|-----|----------------------------------|--------------|---------|
| <b>Complete case</b>         | 232 | 0.90                             | (0.70, 1.16) | 0.428   |
| <b>"Best" case scenario</b>  | 232 | 0.90                             | (0.70, 1.16) | 0.428   |
| <b>"Worst" case scenario</b> | 307 | 0.89                             | (0.69, 1.14) | 0.364   |
| <b>mice</b>                  | 360 | 0.86                             | (0.67, 1.12) | 0.261   |

<sup>a</sup> Adjusted for trial centre and for baseline BPI subscores and baseline PCS. Analysed on the log scale and back transformed

**Table 31: PCS sensitivity analysis: per protocol**

|                     | N   | Difference in means <sup>a</sup> | 95% CI       | p-value |
|---------------------|-----|----------------------------------|--------------|---------|
| 'as randomised'     | 232 | 0.90                             | (0.70, 1.16) | 0.428   |
| <b>Per protocol</b> | 228 | 0.89                             | (0.69, 1.15) | 0.366   |

<sup>a</sup> Adjusted for trial centre and for baseline BPI subscores . Analysed on the log scale and back transformed

**Table 32: PaSol sensitivity analysis: missing data**

|            |                       | N   | Difference in means <sup>a</sup> | 95% CI        | p-value |
|------------|-----------------------|-----|----------------------------------|---------------|---------|
| Solve      | Complete case         | 282 | -1.18                            | (-3.09, 0.74) | 0.226   |
|            | “Best” case scenario  | 362 | -1.20                            | (-2.95, 0.55) | 0.177   |
|            | “Worst” case scenario | 362 | 0.19                             | (-1.74, 2.12) | 0.845   |
|            | mice                  | 362 | -0.56                            | (-1.45, 1.34) | 0.564   |
| Meaning    | Complete case         | 283 | -0.64                            | (-2.83, 1.55) | 0.565   |
|            | “Best” case scenario  | 362 | -0.94                            | (-2.87, 0.99) | 0.338   |
|            | “Worst” case scenario | 362 | 0.52                             | (-1.89, 2.94) | 0.670   |
|            | mice                  | 362 | -0.30                            | (-2.45, 1.85) | 0.784   |
| Acceptance | Complete case         | 276 | -0.22                            | (-1.65, 1.20) | 0.757   |
|            | “Best” case scenario  | 358 | -0.63                            | (-2.00, 0.73) | 0.363   |
|            | “Worst” case scenario | 358 | 0.38                             | (-0.99, 1.75) | 0.586   |
|            | mice                  | 358 | -0.04                            | (-1.41, 1.33) | 0.959   |
| Belief     | Complete case         | 281 | -0.38                            | (-1.47, 0.70) | 0.490   |
|            | “Best” case scenario  | 359 | -0.54                            | (-1.54, 0.46) | 0.285   |
|            | “Worst” case scenario | 359 | 0.10                             | (-0.89, 1.09) | 0.839   |
|            | mice                  | 359 | -0.26                            | (-1.36, 0.85) | 0.645   |

<sup>a</sup> Adjusted for trial centre and for baseline BPI subscores and respective baseline PaSol subscore

**Table 33: PaSol sensitivity analysis: per protocol**

|                    |                 | N   | Difference in means <sup>a</sup> | 95% CI        | p-value |
|--------------------|-----------------|-----|----------------------------------|---------------|---------|
| Solving Pain       | ‘as randomised’ | 282 | -1.18                            | (-3.09, 0.74) | 0.226   |
|                    | Per protocol    | 278 | -1.36                            | (-3.28, 0.56) | 0.163   |
| Meaningful life    | ‘as randomised’ | 283 | -0.64                            | (-2.83, 1.55) | 0.565   |
|                    | Per protocol    | 279 | -0.76                            | (-2.96, 1.45) | 0.500   |
| Acceptance of pain | ‘as randomised’ | 276 | -0.22                            | (-1.65, 1.20) | 0.757   |
|                    | Per protocol    | 272 | -0.37                            | (-1.81, 1.06) | 0.608   |
| Belief in solution | ‘as randomised’ | 281 | -0.38                            | (-1.47, 0.70) | 0.490   |
|                    | Per protocol    | 277 | -0.44                            | (-1.54, 0.65) | 0.426   |

<sup>a</sup> Adjusted for trial centre and for baseline BPI subscores

**Table 34: Patient satisfaction sensitivity analysis: missing data**

|                       | N   | Difference in means <sup>a</sup> | 95% CI         | p-value |
|-----------------------|-----|----------------------------------|----------------|---------|
| Complete case         | 284 | 3.79                             | (-1.47, 9.06)  | 0.157   |
| “Best” case scenario  | 360 | -0.32                            | (-5.39, 4.76)  | 0.902   |
| “Worst” case scenario | 360 | 5.55                             | (-0.08, 11.18) | 0.053   |
| mice                  | 360 | 3.61                             | (-1.90, 9.11)  | 0.197   |

<sup>a</sup> Adjusted for trial centre and for baseline BPI subscores and baseline Satisfaction score

**Table 35: Patient satisfaction sensitivity analysis: per protocol**

|                 | N   | Difference in means <sup>a</sup> | 95% CI        | p-value |
|-----------------|-----|----------------------------------|---------------|---------|
| ‘as randomised’ | 284 | 3.79                             | (-1.47, 9.06) | 0.157   |
| Per protocol    | 280 | 4.17                             | (-1.12, 9.45) | 0.122   |

<sup>a</sup> Adjusted for trial centre and for baseline BPI subscores

Table 36: ICECAP-A sensitivity analysis: missing data

|                       | N   | Difference in means <sup>a</sup> | 95% CI         | p-value |
|-----------------------|-----|----------------------------------|----------------|---------|
| Complete case         | 287 | 0.03                             | (-0.004, 0.06) | 0.085   |
| “Best” case scenario  | 362 | -0.004                           | (-0.04, 0.03)  | 0.839   |
| “Worst” case scenario | 362 | 0.06                             | (-0.005, 0.13) | 0.070   |
| mice                  | 362 | 0.02                             | (-0.02, 0.05)  | 0.381   |

<sup>a</sup> Adjusted for trial centre and for baseline BPI subscores and baseline ICECAP-A

**Table 37: ICECAP-A sensitivity analysis: per protocol**

|                 | N   | Difference in means <sup>a</sup> | 95% CI         | p-value |
|-----------------|-----|----------------------------------|----------------|---------|
| ‘as randomised’ | 287 | 0.03                             | (-0.004, 0.06) | 0.085   |
| Per protocol    | 283 | 0.03                             | (-0.004, 0.06) | 0.080   |

<sup>a</sup> Adjusted for trial centre and for baseline BPI subscores

**Table 38: SF-12 sensitivity analysis: missing data**

|          |                       | N   | Difference in means <sup>a</sup> | 95% CI        | p-value |
|----------|-----------------------|-----|----------------------------------|---------------|---------|
| Physical | Complete case         | 288 | 2.07                             | (-0.10, 4.23) | 0.061   |
|          | “Best” case scenario  | 363 | -1.39                            | (-7.28, 4.50) | 0.643   |
|          | “Worst” case scenario | 363 | 3.12                             | (-0.51, 6.76) | 0.092   |
|          | mice                  | 363 | 1.49                             | (-0.67, 3.66) | 0.176   |
| Mental   | Complete case         | 288 | -0.08                            | (-2.29, 2.12) | 0.940   |
|          | “Best” case scenario  | 363 | -2.22                            | (-7.27, 2.83) | 0.388   |
|          | “Worst” case scenario | 363 | 1.58                             | (-2.86, 6.02) | 0.485   |
|          | mice                  | 363 | -0.17                            | (-2.35, 2.01) | 0.878   |

<sup>a</sup> Adjusted for trial centre and for baseline BPI subscores and respective baseline SF-12 subscore

**Table 39: SF-12 sensitivity analysis: per protocol**

|                          |                 | N   | Difference in means <sup>a</sup> | 95% CI        | p-value |
|--------------------------|-----------------|-----|----------------------------------|---------------|---------|
| Short form-12 (physical) | ‘as randomised’ | 288 | 2.07                             | (-0.10, 4.23) | 0.061   |
|                          | Per protocol    | 284 | 2.05                             | (-0.13, 4.22) | 0.066   |
| Short form-12 (mental)   | ‘as randomised’ | 288 | -0.08                            | (-2.29, 2.12) | 0.940   |
|                          | Per protocol    | 284 | 0.09                             | (-2.11, 2.29) | 0.933   |

<sup>a</sup> Adjusted for trial centre and for baseline BPI subscores

**Table 40: HADS anxiety scale sensitivity analysis: missing data**

|                       | N   | Difference in means <sup>a</sup> | 95% CI        | p-value |
|-----------------------|-----|----------------------------------|---------------|---------|
| Complete case         | 290 | -0.69                            | (-1.47, 0.08) | 0.079   |
| “Best” case scenario  | 363 | 0.16                             | (-0.77, 1.08) | 0.741   |
| “Worst” case scenario | 363 | -1.26                            | (-2.63, 0.11) | 0.071   |
| mice                  | 363 | -0.56                            | (-1.33, 0.21) | 0.150   |

<sup>a</sup> Adjusted for trial centre and for baseline BPI subscores and HADS anxiety

**Table 41: HADS anxiety scale sensitivity analysis: per protocol**

|                 | N   | Difference in means <sup>a</sup> | 95% CI        | p-value |
|-----------------|-----|----------------------------------|---------------|---------|
| ‘as randomised’ | 290 | -0.70                            | (-1.47, 0.08) | 0.079   |
| Per protocol    | 286 | -0.73                            | (-1.51, 0.04) | 0.064   |

<sup>a</sup> Adjusted for trial centre and for baseline BPI subscores

**Table 42: HADS depression scale sensitivity analysis: missing data**

|                       | N   | Difference in means <sup>a</sup> | 95% CI         | p-value |
|-----------------------|-----|----------------------------------|----------------|---------|
| Complete case         | 287 | -0.69                            | (-1.47, 0.10)  | 0.086   |
| “Best” case scenario  | 363 | 0.16                             | (-0.73, 1.05)  | 0.719   |
| “Worst” case scenario | 363 | -1.50                            | (-2.89, -0.11) | 0.035   |
| mice                  | 363 | -0.52                            | (-1.28, 0.23)  | 0.173   |

<sup>a</sup> Adjusted for trial centre and for baseline BPI subscores and baseline HADS depression

**Table 43: HADS depression scale sensitivity analysis: per protocol**

|                 | N   | Difference in means <sup>a</sup> | 95% CI        | p-value |
|-----------------|-----|----------------------------------|---------------|---------|
| ‘as randomised’ | 287 | -0.69                            | (-1.47, 0.10) | 0.086   |
| Per protocol    | 283 | -0.72                            | (-1.51, 0.08) | 0.077   |

<sup>a</sup> Adjusted for trial centre and for baseline BPI subscores

**Table 44: Chronic widespread pain sensitivity analysis: missing data**

|                       | N   | Odds Ratio <sup>a</sup> | 95% CI       | p-value |
|-----------------------|-----|-------------------------|--------------|---------|
| Complete case         | 280 | 0.61 <sup>a</sup>       | (0.20, 1.91) | 0.399   |
| “Best” case scenario  | 325 | 0.59 <sup>b</sup>       | (0.20, 1.71) | 0.328   |
| “Worst” case scenario | 363 | 0.61 <sup>a</sup>       | (0.34, 1.08) | 0.008   |
| mice                  | 363 | 0.65 <sup>a</sup>       | (0.22, 1.90) | 0.432   |

<sup>a</sup> Adjusted for trial centre and for baseline BPI subscores and baseline CWP

<sup>b</sup> Adjusted for baseline BPI subscores and baseline CWP

**Table 45: Chronic widespread pain sensitivity analysis: per protocol**

|                     | N   | Odds Ratio <sup>a</sup> | 95% CI       | p-value |
|---------------------|-----|-------------------------|--------------|---------|
| 'as randomised'     | 313 | 0.61                    | (0.20, 1.91) | 0.399   |
| <b>Per protocol</b> | 307 | 0.60                    | (0.32, 1.14) | 0.122   |

<sup>a</sup> Adjusted for trial centre and for baseline BPI subscores

**Table 46: Frequency of pain sensitivity analysis: missing data**

|                                  |                              | N   | Odds Ratio <sup>a</sup> | 95% CI       | p-value |
|----------------------------------|------------------------------|-----|-------------------------|--------------|---------|
| <b>Section A:<br/>Question 5</b> | <b>Complete case</b>         | 311 | 0.64                    | (0.34, 1.21) | 0.170   |
|                                  | <b>"Best" case scenario</b>  | 361 | 0.95                    | (0.59, 1.52) | 0.836   |
|                                  | <b>"Worst" case scenario</b> | 361 | 0.61                    | (0.33, 1.13) | 0.120   |
|                                  | <b>mice</b>                  | 361 | 0.62                    | (0.34, 1.14) | 0.123   |
| <b>Section D:<br/>Question 8</b> | <b>Complete case</b>         | 291 | 0.55                    | (0.27, 1.11) | 0.095   |
|                                  | <b>"Best" case scenario</b>  | 362 | 0.92                    | (0.57, 1.47) | 0.724   |
|                                  | <b>"Worst" case scenario</b> | 362 | 0.59                    | (0.30, 1.16) | 0.124   |
|                                  | <b>mice</b>                  | 362 | 0.62                    | (0.32, 1.20) | 0.155   |

<sup>a</sup> Adjusted for trial centre and for baseline BPI subscores and baseline freq. of pain

<sup>b</sup> Adjusted for baseline BPI subscores and baseline freq. of pain

**Table 47: Frequency of pain sensitivity analysis: per protocol**

|                                  |                     | N   | Odds Ratio <sup>a</sup> | 95% CI       | p-value |
|----------------------------------|---------------------|-----|-------------------------|--------------|---------|
| <b>Section A:<br/>Question 5</b> | 'as randomised'     | 311 | 0.64                    | (0.34, 1.21) | 0.170   |
|                                  | <b>Per protocol</b> | 307 | 0.60                    | (0.32, 1.14) | 0.122   |
| <b>Section D:<br/>Question 8</b> | 'as randomised'     | 291 | 0.55                    | (0.27, 1.11) | 0.095   |
|                                  | <b>Per protocol</b> | 287 | 0.54                    | (0.27, 1.11) | 0.094   |

<sup>a</sup> Adjusted for trial centre and for baseline BPI subscores

**Table 48: Comparison of pain to pre-operative pain sensitivity analysis: missing data**

|                              | N   | Odds Ratio <sup>a</sup> | 95% CI       | p-value |
|------------------------------|-----|-------------------------|--------------|---------|
| <b>Complete case</b>         | 289 | 0.62                    | (0.34, 1.12) | 0.113   |
| <b>"Best" case scenario</b>  | 362 | 0.83                    | (0.50, 1.36) | 0.451   |
| <b>"Worst" case scenario</b> | 362 | 0.59                    | (0.35, 0.98) | 0.042   |
| <b>mice</b>                  | 362 | 0.59                    | (0.36, 0.98) | 0.041   |

<sup>a</sup> Adjusted for trial centre and for baseline BPI subscores and baseline comparison of pain

<sup>b</sup> Adjusted for baseline BPI subscores and baseline CWP

**Table 49: Comparison of pain to pre-operative pain sensitivity analysis: per protocol**

|                     | N   | Odds Ratio <sup>a</sup> | 95% CI       | p-value |
|---------------------|-----|-------------------------|--------------|---------|
| 'as randomised'     | 289 | 0.62                    | (0.34, 1.12) | 0.113   |
| <b>Per protocol</b> | 285 | 0.60                    | (0.33, 1.10) | 0.097   |

<sup>a</sup> Adjusted for trial centre and for baseline BPI subscores

**Table 50: Adverse reactions**

| Relatedness to trial intervention: |                    | Frequency | Site | Details                                                                                                                                                                             |
|------------------------------------|--------------------|-----------|------|-------------------------------------------------------------------------------------------------------------------------------------------------------------------------------------|
| Severity:                          | Not serious        | 1 (100%)  | 2    | Participant phoned the research team in distress following receipt of her intervention referral letter; a referral for anxiety/depression had not been discussed at her appointment |
|                                    | Serious unexpected | 0         |      |                                                                                                                                                                                     |
|                                    | Serious expected   | 0         |      |                                                                                                                                                                                     |

**Table 51: Responder analysis**

|                                     | BPI pain severity |             |              | BPI interference |             |              |
|-------------------------------------|-------------------|-------------|--------------|------------------|-------------|--------------|
|                                     | Intervention      | Control     | Overall      | Intervention     | Control     | Overall      |
| N available data                    | 212               | 100         | 312          | 213              | 100         | 313          |
| Got better by 30% or more           | 132 (62.26%)      | 54 (54.00%) | 186 (59.62%) | 135 (63.38%)     | 59 (59.00%) | 194 (61.98%) |
| Stayed withing a +/- 30% difference | 67 (31.60%)       | 33 (33.00%) | 100 (32.05%) | 70 (32.86%)      | 35 (35.00%) | 105 (33.55%) |
| Got worse by 30% or more            | 13 (6.13%)        | 13 (13.00%) | 26 (8.33%)   | 8 (3.76%)        | 6 (6.00%)   | 14 (4.47%)   |

**Table 52 Studies from systematic review**

| Study<br>Country, date of recruitment                       | Inclusion<br>Number randomised (intervention; control)                                                    | Intervention<br>Comparator                                                                       | Risk of bias issues<br>Key results                                                                           |
|-------------------------------------------------------------|-----------------------------------------------------------------------------------------------------------|--------------------------------------------------------------------------------------------------|--------------------------------------------------------------------------------------------------------------|
| <b>Published studies</b>                                    |                                                                                                           |                                                                                                  |                                                                                                              |
| Singh et al. 2010 <sup>1</sup><br>USA, 2006-2009            | Pain after total knee replacement for >3 months, NRS pain intensity $\geq 6/10$<br>N=54: 60 knees (30:30) | Single intra-articular botulinum toxin A injection<br>Single intra-articular injection of saline | Low risk of bias<br>Reduced pain intensity in botulinum A group after 3 months. Pain relief to about 40 days |
| Ma et al. 2016 <sup>2</sup><br>China, 2014-2015             | Intractable pain of knee joint after total knee replacement<br>N=100 (50:50)                              | Denervation therapy<br>Drug treatment                                                            | No losses to follow up<br>Denervation therapy associated with improved symptoms                              |
| Pickering et al. <sup>3</sup><br>France, 2016               | Localized neuropathic pain after knee surgery<br>N=36 (24;12)                                             | 5% lidocaine-medicated plaster for 3 months<br>5% plaster with no drug for 3 months              | No losses to follow up<br>Lidocaine plaster reduced localized neuropathic pain                               |
| Qudsi-Sinclair et al. 2017 <sup>4</sup><br>Spain, 2012-2014 | Pain after total knee replacement<br>N=33 (15:18, 14:14 received intervention)                            | Single radiofrequency genicular nerve block<br>Single analgesic block with corticosteroid        | Some concerns: uneven follow up in small study<br>Similar pain outcomes in groups                            |
| <b>From trial registries</b>                                |                                                                                                           |                                                                                                  |                                                                                                              |
| NCT02211534 <sup>5</sup>                                    | Persistent post-operative pain following total knee replacement                                           | Pulsed electromagnetic energy field therapy<br>Sham pulsed electromagnetic field                 |                                                                                                              |
| NCT02931435 <sup>6</sup>                                    | Chronic knee pain despite total knee replacement at least 6 months                                        | Nerve block with radiofrequency ablation<br>Sham radiofrequency ablation                         |                                                                                                              |
| NCT03825965 <sup>7</sup>                                    | Persistent post-surgical pain following total knee replacement                                            | Cannabinoids<br>Placebo                                                                          |                                                                                                              |
| NCT04100707 <sup>8</sup>                                    | Knee pain 3 months after total knee replacement                                                           | Genicular nerve blocks<br>Sham comparator                                                        |                                                                                                              |
| NCT03973177 <sup>9</sup><br>Crossover                       | Refractory chronic knee pain for more than 6 months after total knee replacement                          | Phenol injection: neurolysis of genicular nerves<br>Methylprednisolone injection                 |                                                                                                              |
| Larsen et al. 2020 <sup>10,11</sup>                         | Chronic pain after primary total knee replacement                                                         | Neuromuscular exercise and pain neuroscience education<br>Pain neuroscience education            |                                                                                                              |

## **Supplementary Information relating to the economic evaluation**

### **Information received from informatics departments:**

Informatics departments provided electronic information for inpatient stays and daycases in the form of: ICD10 (International Statistical Classification of Diseases), OPCS4 (International Classification of Interventions and Procedures), HRG (Health Resource Group) codes, admission and discharge dates; and for outpatient visits, Imaging and Emergency department attendances (if the centre had an A&E department) in the form of: service codes, HRG/Currency codes and attendance dates.

Clinical opinion was used to ensure only admissions, outpatient visits and emergency department attendances which were related to the STAR pathway, pain or knee replacement were included in the analysis. To avoid double counting all outpatient appointments and x rays occurring on the STAR clinic dates were deleted from the informatics data. Each hospital admission was classified into Daycase, short stay (<2 days) and longstay.

### **Sensitivity analyses:**

The following sensitivity analyses were conducted where there was methodological uncertainty, or assumptions were made during the study and analysis:

- 1) Changing the ratio of direct to indirect time in the calculation of the unit cost for the ESPs.
- 2) Altering the assumption that the home care worker visit use, would be the same for the whole of the 6 months as it was for one week (as asked in the follow-up questionnaires) to 3 months and 1 month.
- 3) Costing the Home changes and equipment at a quarter and a half of the initial cost, to take into account that some of the equipment would be returned.
- 4) Assuming that when it was unclear who paid for the home changes and equipment, the provider was the NHS/PSS.
- 5) Excluding “other” community-based services such as hydrotherapy, which may have been accounted for in the outpatient attendances.
- 6) Costing HRG’s using an elective inpatient cost, rather than non-elective inpatient short stay and long stay costs.



**Table 53 CHEERS checklist**

| <b>Section/item</b>             | <b>Item</b> | <b>Recommendation</b>                                                                                                                                                                   | <b>Reported on page no/line no</b>                                                                                                                              |
|---------------------------------|-------------|-----------------------------------------------------------------------------------------------------------------------------------------------------------------------------------------|-----------------------------------------------------------------------------------------------------------------------------------------------------------------|
| Title and abstract              |             |                                                                                                                                                                                         |                                                                                                                                                                 |
| Title                           | 1           | Identify the study as an economic evaluation or use more specific terms such as “cost-effectiveness analysis”, and describe the interventions compared.                                 | Not applicable as reporting the RCT                                                                                                                             |
| Abstract                        | 2           | Provide a structured summary of objectives, perspective, setting, methods (including study design and inputs), results (including base case and uncertainty analyses), and conclusions. | Abstract: pg 4-5: note given this is a joint paper, there was not space to include all the methods relating to economic evaluation and the uncertainty analyses |
| Introduction                    |             |                                                                                                                                                                                         |                                                                                                                                                                 |
| Background and objectives       | 3           | Provide an explicit statement of the broader context for the study.<br><br>Present the study question and its relevance for health policy or practice decisions.                        | Background: pg 6-7                                                                                                                                              |
| Methods                         |             |                                                                                                                                                                                         |                                                                                                                                                                 |
| Target population and subgroups | 4           | Describe characteristics of the base case population and subgroups analysed, including why they were chosen.                                                                            | Participants: pg 7                                                                                                                                              |
| Setting and location            | 5           | State relevant aspects of the system(s) in which the decision(s) need(s) to be made.                                                                                                    | Study design: pg 7                                                                                                                                              |
| Study perspective               | 6           | Describe the perspective of the study and relate this to the costs being evaluated.                                                                                                     | Measurement and valuation of resource use data: pg 12                                                                                                           |
| Comparators                     | 7           | Describe the interventions or strategies being compared and state why they were chosen.                                                                                                 | Procedures: pg 9-11                                                                                                                                             |
| Time horizon                    | 8           | State the time horizon(s) over which costs and consequences are being evaluated and say why appropriate.                                                                                | Measurement and valuation of resource use data pg 12. As an RCT based analysis the time horizon was the same for the                                            |

|                                                        |     |                                                                                                                                                                                                                                                                                                                                  |                                                                                              |
|--------------------------------------------------------|-----|----------------------------------------------------------------------------------------------------------------------------------------------------------------------------------------------------------------------------------------------------------------------------------------------------------------------------------|----------------------------------------------------------------------------------------------|
|                                                        |     |                                                                                                                                                                                                                                                                                                                                  | effectiveness and cost-effectiveness measures                                                |
| Discount rate                                          | 9   | Report the choice of discount rate(s) used for costs and outcomes and say why appropriate.                                                                                                                                                                                                                                       | N/A                                                                                          |
| Choice of health outcomes                              | 10  | Describe what outcomes were used as the measure(s) of benefit in the evaluation and their relevance for the type of analysis performed.                                                                                                                                                                                          | Outcomes: pg12 and reference 26                                                              |
| Measurement of effectiveness                           | 11a | <i>Single study-based estimates:</i> Describe fully the design features of the single effectiveness study and why the single study was a sufficient source of clinical effectiveness data.                                                                                                                                       | Methods: pg 7-pg 15. pg 6 line 20                                                            |
|                                                        | 11b | <i>Synthesis-based estimates:</i> Describe fully the methods used for identification of included studies and synthesis of clinical effectiveness data.                                                                                                                                                                           | N/A                                                                                          |
| Measurement and valuation of preference based outcomes | 12  | If applicable, describe the population and methods used to elicit preferences for outcomes.                                                                                                                                                                                                                                      | N/A                                                                                          |
| Estimating resources and costs                         | 13a | <i>Single study-based economic evaluation:</i> Describe approaches used to estimate resource use associated with the alternative interventions. Describe primary or secondary research methods for valuing each resource item in terms of its unit cost.<br><br>Describe any adjustments made to approximate to opportunity cost | Measurement and valuation of resource use data pg 12. Supplementary material pg 23, Table 55 |
|                                                        | 13b | <i>Model-based economic evaluation:</i> Describe approaches and data sources used to estimate resource use associated with model health states. Describe primary or secondary research methods for valuing each resource item in terms of its unit cost. Describe any adjustments made to approximate to opportunity costs.      | N/A                                                                                          |
| Currency, price date, and conversion                   | 14  | Report the dates of the estimated resource quantities and unit costs. Describe methods for adjusting estimated unit costs to the year of reported costs if necessary. Describe methods for converting costs into a common currency base and the exchange rate.                                                                   | Measurement and valuation of resource use data pg 12                                         |
| Choice of model                                        | 15  | Describe and give reasons for the specific type of decision-analytical model used. Providing a figure to show model structure is strongly recommended.                                                                                                                                                                           | N/A                                                                                          |
| Assumptions                                            | 16  | Describe all structural or other assumptions underpinning the decision-analytical model.                                                                                                                                                                                                                                         | N/A                                                                                          |
| Analytical methods                                     | 17  | Describe all analytical methods supporting the evaluation. This could include methods for dealing with skewed, missing, or censored data; extrapolation methods; methods for pooling data; approaches to validate or make adjustments (such as half cycle corrections) to a model;                                               | Cost-effectiveness analysis: pg 14-15. Supplementary material pg 23                          |

|                                                                      |     |                                                                                                                                                                                                                                                                             |                                                      |
|----------------------------------------------------------------------|-----|-----------------------------------------------------------------------------------------------------------------------------------------------------------------------------------------------------------------------------------------------------------------------------|------------------------------------------------------|
|                                                                      |     | and methods for handling population heterogeneity and uncertainty.                                                                                                                                                                                                          |                                                      |
| Results                                                              |     |                                                                                                                                                                                                                                                                             |                                                      |
| Study parameters                                                     | 18  | Report the values, ranges, references, and, if used, probability distributions for all parameters. Report reasons or sources for distributions used to represent uncertainty where appropriate. Providing a table to show the input values is strongly recommended.         | N/A                                                  |
| Incremental costs and outcomes                                       | 19  | For each intervention, report mean values for the main categories of estimated costs and outcomes of interest, as well as mean differences between the comparator groups. If applicable, report incremental cost-effectiveness ratios.                                      | Results: pg 18 & Table 3                             |
| Characterising uncertainty                                           | 20a | <i>Single study-based economic evaluation:</i> Describe the effects of sampling uncertainty for the estimated incremental cost and incremental effectiveness parameters, together with the impact of methodological assumptions (such as discount rate, study perspective). | Results: pg 18-19<br>Supplementary material Table 60 |
|                                                                      | 20b | <i>Model-based economic evaluation:</i> Describe the effects on the results of uncertainty for all input parameters, and uncertainty related to the structure of the model and assumptions.                                                                                 | N/A                                                  |
| Characterising heterogeneity                                         | 21  | If applicable, report differences in costs, outcomes, or cost-effectiveness that can be explained by variations between subgroups of patients with different baseline characteristics or other observed variability in effects that are not reducible by more information.  | N/A                                                  |
| Discussion                                                           |     |                                                                                                                                                                                                                                                                             |                                                      |
| Study findings, limitations, generalisability, and current knowledge | 22  | Summarise key study findings and describe how they support the conclusions reached. Discuss limitations and the generalisability of the findings and how the findings fit with current knowledge.                                                                           | Discussion pg 19-22                                  |
| Other                                                                |     |                                                                                                                                                                                                                                                                             |                                                      |
| Source of funding                                                    | 23  | Describe how the study was funded and the role of the funder in the identification, design, conduct, and reporting of the analysis. Describe other non-monetary sources of support.                                                                                         | Role of funding source pg 15. Funding pg 25          |

|                       |    |                                                                                                                                                                                                                                                   |                              |
|-----------------------|----|---------------------------------------------------------------------------------------------------------------------------------------------------------------------------------------------------------------------------------------------------|------------------------------|
| Conflicts of interest | 24 | Describe any potential for conflict of interest of study contributors in accordance with journal policy. In the absence of a journal policy, we recommend authors comply with International Committee of Medical Journal Editors recommendations. | Competing Interests:<br>pg24 |
|-----------------------|----|---------------------------------------------------------------------------------------------------------------------------------------------------------------------------------------------------------------------------------------------------|------------------------------|

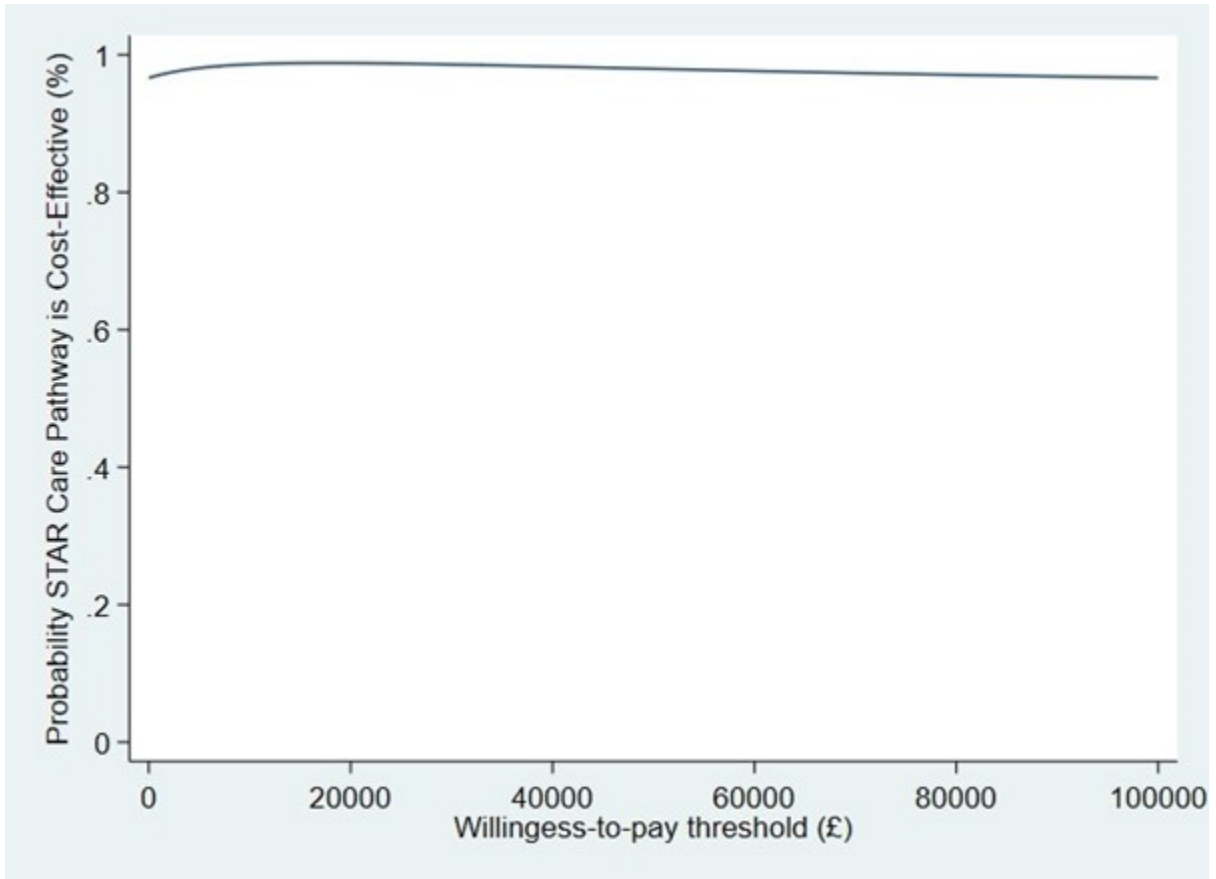

**Figure 5: Cost-effectiveness acceptability curve from the NHS/PSS perspective**

**Table 54 Resources collected and their valuation (2019/20 prices excluding VAT)**

| Resource                                              | Unit Cost (£)               | Source of Cost                                                                                                                                                            |
|-------------------------------------------------------|-----------------------------|---------------------------------------------------------------------------------------------------------------------------------------------------------------------------|
| STAR pathway assessment clinic (minutes)              | Varies <sup>a</sup>         | Curtis and Burns (2020) <sup>12</sup>                                                                                                                                     |
| Inpatient and Daycase admissions                      | Varies <sup>b,c</sup>       | NHS Reference Costs <sup>13</sup>                                                                                                                                         |
| Outpatient appointments                               | Varies <sup>c,d</sup>       | NHS Reference Costs <sup>13</sup>                                                                                                                                         |
| Outpatient procedures                                 | Varies <sup>c</sup>         | NHS Reference Costs <sup>13</sup>                                                                                                                                         |
| Radiology investigations                              | Varies <sup>c</sup>         | NHS Reference Costs <sup>13</sup>                                                                                                                                         |
| Accident and Emergency attendances (no admission)     | Varies <sup>c</sup>         | NHS Reference Costs <sup>13</sup>                                                                                                                                         |
| General Practitioner (Surgery)                        | 39.23                       | Curtis and Burns (2020) <sup>12</sup>                                                                                                                                     |
| General Practitioner (Home)                           | 124.69 <sup>c</sup>         | Curtis and Burns (2013) <sup>14</sup>                                                                                                                                     |
| General Practitioner (Phone)                          | 17.20 <sup>e</sup>          | Curtis and Burns (2020) <sup>12</sup>                                                                                                                                     |
| Nurse (Surgery)                                       | 10.85 <sup>f</sup>          | Curtis and Burns (2020) <sup>12</sup>                                                                                                                                     |
| Nurse (Phone)                                         | 4.60 <sup>g</sup>           | Curtis and Burns (2020) <sup>12</sup>                                                                                                                                     |
| District Nurse                                        | 41.05 <sup>c</sup>          | Curtis and Burns (2015) <sup>15</sup>                                                                                                                                     |
| Community physiotherapist                             | 48.00 <sup>h</sup>          | Curtis and Burns (2020) <sup>12</sup>                                                                                                                                     |
| Acupuncturist (NHS and private)                       | Varies <sup>h</sup>         | Curtis and Burns (2020) <sup>12</sup> and patient's reported cost                                                                                                         |
| Hydrotherapy session (NHS and private)                | Varies <sup>h</sup>         | Curtis and Burns (2020) <sup>12</sup> and patient's reported cost                                                                                                         |
| NHS 111 Service                                       | 9.19 per call <sup>c</sup>  | Turner et al (2012) <sup>16</sup>                                                                                                                                         |
| Other NHS and Community-based health service contacts | Varies                      | Curtis and Burns (2020) <sup>12</sup> , NHS Reference Costs <sup>13</sup> , patient's reported cost                                                                       |
| Medications                                           | Varies <sup>i</sup>         | British National Formulary <sup>17</sup>                                                                                                                                  |
| Prescription Charges                                  | 9.15 per item               | NHS (2020) <sup>18</sup>                                                                                                                                                  |
| Home Care Worker                                      | 30.29 per hour <sup>j</sup> | Curtis and Burns (2020) <sup>12</sup>                                                                                                                                     |
| Home Changes and Equipment                            | Varies                      | NRS Healthcare <sup>19</sup> , Curtis and Burns (2019) <sup>20</sup> patient reported costs                                                                               |
| Wage rate                                             | 13.68 <sup>k</sup>          | ONS Annual Survey of Hours and Earnings (2020) <sup>21</sup>                                                                                                              |
| Community based Travel cost per journey               | Varies                      | The patient's reported mode of transport to each healthcare facility and the fare/miles reported were used to create a mean unit cost for travel to each health facility. |
| Hospital based Travel cost per journey                | Varies                      | The patient's postcode was used to estimate mileage from the hospital.                                                                                                    |

<sup>a</sup> Based on the Extended Scope Practitioners pay band, using a ratio of 75% contact to 25% non-contact time. This unit cost includes an allowance for training and study days.

<sup>b</sup> Each admission was assigned an Health Resource Group (HRG) code. The daycase, short stay (<2days) and longstay non elective inpatient reference cost related to the respective HRG code was used.

<sup>c</sup> Costs inflated to 2019-20 values using the NHS cost inflation index (NHSCII)<sup>12</sup>

<sup>d</sup> A unit cost relating to the relevant service code (i.e. speciality) was used.

<sup>e</sup> Based on triage time of 4 minutes.

<sup>f</sup> Based on a 15.5minute consultation<sup>15</sup>.

<sup>g</sup> Based on triage time of 6.56 minutes.

<sup>h</sup> NHS costs were based on a band 7 hour of working time.

<sup>i</sup> Costs calculated on stated dosage and frequency; if missing, usual dose was used.

<sup>j</sup> Cost based on weighted average of weekday and weekend face-to-face costs for independent sector home care provided for social services.

<sup>k</sup> Based on median hourly earnings for all employees.

<sup>l</sup> Mileage was costed using NHS Terms and Conditions of Service Handbook<sup>22</sup>. Missing non-GP unit costs of travel were imputed using GP unit costs of travel.

**Table 55 Mean resource use from an NHS and PSS perspective by category and randomised allocation**

| Resource Use Category: NHS and PSS (unit of measurement)                                                 | STAR care pathway |                            | Usual Care |                            |
|----------------------------------------------------------------------------------------------------------|-------------------|----------------------------|------------|----------------------------|
|                                                                                                          | N                 | Mean Resource Use (95% CI) | N          | Mean Resource Use (95% CI) |
| STAR care pathway – assessment clinic time (minutes of clinic – excluding x-ray time)                    | 242               | 47.71 (45.33, 50.10)       | 121        | 0 (0,0)                    |
| STAR care pathway follow-up calls (number of calls)                                                      | 224               | 3.07 (2.85, 3.28)          | 121        | 0 (0,0)                    |
| Inpatient stays (number of stays)                                                                        | 228               | 0.13 (0.09, 0.18)          | 112        | 0.25 (0.12, 0.38)          |
| Subsequent outpatient visits (number of visits)                                                          | 228               | 7.21 (6.22,8.21)           | 112        | 7.29 (5.83, 8.76)          |
| Outpatient procedures (number of procedures)                                                             | 228               | 0.13 (0.02, 0.23)          | 112        | 0.04 (0.00, 0.07)          |
| Radiology visits (number of visits)                                                                      | 228               | 0.65 (0.48, 0.82)          | 112        | 0.79 (0.53, 1.05)          |
| A&E (number of visits) <sup>1</sup>                                                                      | 226               | 0.14 (0.09, 0.20)          | 111        | 0.14 (0.05, 0.24)          |
| 6 months: GP contacts (practice visits, home visits, phone calls) (number of contacts) <sup>3</sup>      | 201               | 0.97 (0.70, 1.23)          | 97         | 0.51 (0.25, 0.76)          |
| 12 months:GP contacts (number of contacts) <sup>3</sup>                                                  | 196               | 0.51 (0.31,0.71)           | 92         | 0.32(0.12,0.51)            |
| 6-months: NHS Physiotherapist/ Acupuncture/ Hydrotherapy visits (number of visits) <sup>3</sup>          | 200               | 1.32 (0.84,1.79)           | 96         | 1.65 (0.73, 2.58)          |
| 12 months: NHS Physiotherapist/ Acupuncture/ Hydrotherapy visits (number of visits) <sup>3</sup>         | 197               | 0.60 (0.17,1.02)           | 92         | 0.26 (0.06,0.46)           |
| 6 months: Other NHS community-based health service contacts <sup>2,3</sup> (number of contacts)          | 198               | 0.89 (0.33, 1.44)          | 96         | 0.81 (0.22, 1.40)          |
| 12 months: Other NHS community-based health service contacts (number of contacts) <sup>3</sup>           | 196               | 0.31 (0.04,0.58)           | 92         | 0.14 (-.01,0.30)           |
| 6 months:Home care worker NHS paid (number of visits) <sup>3</sup>                                       | 206               | 0.50 (-0.28, 1.29)         | 100        | 0.78 (-0.37, 1.92)         |
| 12 months:Home care worker NHS paid (number of visits) <sup>3</sup>                                      | 199               | 0.13 (-0.13,0.39)          | 92         | 0 (0,0)                    |
| 6 months: Home changes/equipment (NHS/PSS provided only) (number of home changes/equipment) <sup>3</sup> | 199               | 0.38 (0.24,0.53)           | 91         | 0.40 (0.18, 0.61)          |
| 12 months:Home changes/equipment (NHS/PSS provided only) (number of home changes/equipment) <sup>3</sup> | 195               | 0.05 (0.01,0.9)            | 89         | 0.10 (0.02,0.18)           |
| 6 months: Medications (number of prescribed medications) <sup>3</sup>                                    | 210               | 1.88 (1.61,2.15)           | 100        | 1.69(1.34,2.01)            |
| 12 months: Medications (number of prescribed medications) <sup>3</sup>                                   | 201               | 1.23 (1.00,1.46)           | 95         | 1.53 (1.19,1.87)           |

<sup>1</sup> Obtained from informatic data except for patients at Birmingham and Oswestry centres, where questionnaire information was used

<sup>2</sup>nurse practice visits, nurse phone calls, district nurse visits, NHS 111 and other community care.

<sup>3</sup> If the question had not been answered, but other items within the question section had been answered then no contact or use of this resource was assumed.

**Table 56 Mean resource use from a patient perspective by category and randomised allocation<sup>1</sup>**

| Resource Use Category: Patient (unit of measurement):                                          | STAR care pathway |                            | Usual Care |                            |
|------------------------------------------------------------------------------------------------|-------------------|----------------------------|------------|----------------------------|
|                                                                                                | N                 | Mean Resource Use (95% CI) | N          | Mean Resource Use (95% CI) |
| 6 months: Private Physiotherapist/ Acupuncture/ Hydrotherapy visits (number of visits)         | 205               | 0.51 (0.19, 0.84)          | 97         | 0.15 (0.01, 0.30)          |
| 12 months: Private Physiotherapist/ Acupuncture/ Hydrotherapy visits (number of visits)        | 197               | 0.06 (-0.01,0.13)          | 92         | 0.12 (-0.10,0.34)          |
| 6 months: Other private community-based health service contacts (number of contacts)           | 205               | 0.28 (0.06,0.50)           | 97         | 0.18 (-0.04, 0.39)         |
| 12 months: Other private community-based health service contacts (number of contacts)          | 198               | 0.64 (-0.13,1.41)          | 93         | 0.54 (-0.05,0.16)          |
| 6 months: Prescription Charges (number of charges)                                             | 235               | 0.23 (0.12,0.35)           | 116        | 0.18 (0.03,0.33)           |
| 12 months: Prescription Charges (number of charges)                                            | 232               | 0.13 (0.05,0.21)           | 116        | 0.22 (0.06,0.39)           |
| 6 months: non prescription medication (% of participants)                                      | 196               | 0.39 (0.32,0.46)           | 87         | 0.39 (0.29,0.50)           |
| 12 months: non prescription medication (% of participants)                                     | 196               | 0.30 (0.24,0.37)           | 90         | 0.32 (0.22,0.42)           |
| 6 months:Home changes/equipment (privately purchased only) (number of home changes/equipment)  | 199               | 0.18 (0.10, 0.26)          | 89         | 0.10 (0.03, 0.17)          |
| 12 months:Home changes/equipment (privately purchased only) (number of home changes/equipment) | 195               | 0.04 (0.01,0.07)           | 90         | 0.09 (0.01,0.16)           |
| 6 months: Home care worker privately paid (number of visits)                                   | 206               | 0.50 (-0.49,1.50)          | 100        | 0.00                       |
| 12 months: Home care worker privately paid (number of visits)                                  | 199               | 0.00                       | 83         | 0.00                       |
| 6 months: Hours of Unpaid Leave (number of hours)                                              | 205               | 7.06 (1.09, 13.02)         | 100        | 12.78 (-5.61,31.17)        |
| 12 months: Hours of Unpaid Leave (number of hours)                                             | 197               | 2.61 (-2.54,7.76)          | 93         | 8.11 (-2.2,18.41)          |

<sup>1</sup> If the question item had not been answered, but other items within the question section had been answered then no contact or use of this resource was assumed.

**Table 57 Mean costs from an NHS and PSS perspective by category and randomised allocation**

| Resource Use Category: NHS and PSS                                             | STAR care pathway |                         | Usual Care |                          |
|--------------------------------------------------------------------------------|-------------------|-------------------------|------------|--------------------------|
|                                                                                | N                 | Mean Costs £ (95% CI)   | N          | Mean Costs £ (95% CI)    |
| STAR care pathway – assessment clinic (including x-rays and follow up calls)   | 242               | 183.75 (177.05, 190.47) | 121        | 0 (0,0)                  |
| Inpatient admissions                                                           | 228               | 494.00 (241.23,746.78)  | 112        | 1184.12 (543.01,1825.22) |
| Subsequent outpatient visits                                                   | 228               | 684.46 (595.74,773.17)  | 112        | 699.70 (570.90,828.50)   |
| Outpatient procedures                                                          | 228               | 21.30 (3.40,39.20)      | 112        | 6.44 (-0.17,13.04)       |
| Radiology visits                                                               | 228               | 56.03 (38.25,73.81)     | 112        | 66.32 (43.56,89.07)      |
| A&E <sup>1</sup>                                                               | 226               | 28.70 (17.72,39.68)     | 111        | 31.79 (11.08,52.56)      |
| 6 months: GP contacts (practice visits, home visits, phone calls) <sup>3</sup> | 201               | 34.23 (24.40,44.07)     | 97         | 18.23 (8.92,27.53)       |
| 12 months:GP contacts <sup>3</sup>                                             | 196               | 17.98 (11.12,24.83)     | 92         | 11.65 (4.71,18.58)       |
| 6-months: NHS Physiotherapist/ Acupuncture/ Hydrotherapy visits <sup>3</sup>   | 200               | 63.12 (40.13,86.11)     | 96         | 79.5 (35.26,123.74)      |



|                                                                               |     |                      |     |                       |
|-------------------------------------------------------------------------------|-----|----------------------|-----|-----------------------|
| 12 months: NHS Physiotherapist/ Acupuncture/ Hydrotherapy visits <sup>3</sup> | 197 | 28.75 (8.38,49.18)   | 92  | 12.52 (2.76,22.28)    |
| 6 months: Other NHS community-based health service contacts <sup>2,3</sup>    | 198 | 16.45 (3.81,29.09)   | 96  | 20.64 (5.64,35.64)    |
| 12 months: Other NHS community-based health service contacts <sup>3</sup>     | 196 | 6.45 (0.53,12.27)    | 92  | 0.62 (-0.17,1.41)     |
| 6 months:Home care worker NHS paid <sup>3</sup>                               | 205 | 1.92 (-1.97,5.71)    | 100 | 27.56 (-19.88,75.00)  |
| 12 months:Home care worker NHS <sup>3</sup>                                   | 199 | 1.98 (-1.92,5.88)    | 91  | 0 (0,0)               |
| 6 months: Home changes/equipment (NHS/PSS provided only) <sup>3</sup>         | 199 | 285.58(40.76,530.40) | 91  | 108.13 (20.78,195.49) |
| 12 months:Home changes/equipment (NHS/PSS provided only) <sup>3</sup>         | 195 | 5.98 (1.28,10.68)    | 89  | 301.85 (10.29,593.40) |
| 6 months: Medications <sup>3</sup>                                            | 210 | 31.66 (23.48,39.84)  | 100 | 33.05 (22.30,43.80)   |
| 12 months: Medications <sup>3</sup>                                           | 201 | 21.21 (14.48,27.94)  | 94  | 26.54 (17.90,35.17)   |

<sup>1</sup> Obtained from informatic data except for patients at Birmingham and Oswestry centres, where questionnaire information was used

<sup>2</sup>nurse practice visits, nurse phone calls, district nurse visits, NHS 111 and other community care.

<sup>3</sup> If the question had not been answered, but other items within the question section had been answered then no contact or use of this resource was assumed.

**Table 58 Mean utilities over time and by randomised allocation**

| Time point | STAR care pathway |                       | Usual Care |                       |
|------------|-------------------|-----------------------|------------|-----------------------|
|            | N                 | Mean utility (95% CI) | N          | Mean utility (95% CI) |
| Baseline   | 239               | 0.448 (0.420, 0.475)  | 119        | 0.448(0.410,0.487)    |
| 6 months   | 212               | 0.547 (0.514, 0.579)  | 103        | 0.508 (0.457, 0.558)  |
| 12 months  | 212               | 0.566 (0.532,0.600)   | 101        | 0.538 (0.489, 0.587)  |

**Table 59 VAS scores over time and by randomised allocation**

| Time point | STAR care pathway |                         | Usual Care |                         |
|------------|-------------------|-------------------------|------------|-------------------------|
|            | N                 | Mean VAS score (95% CI) | N          | Mean VAS score (95% CI) |
| Baseline   | 242               | 59.01 (56.43,61.59)     | 121        | 60.24 (56.64,63.84)     |
| 6 months   | 214               | 63.49 (60.63, 66.35)    | 104        | 62.36 (58.24,66.47)     |
| 12 months  | 213               | 65.22 (62.26, 68.18)    | 101        | 58.78 (53.84, 63.73)    |

**Table 60 One-way sensitivity analyses for the economic evaluation**

|                                                                                            | Adjusted Costs <sup>1</sup> (£) | Adjusted QALYs <sup>1</sup> | Incremental Costs            | Incremental QALYs     | Incremental NMB (£) at £20,000/QALY | Probability cost-effective at £20k per QALY threshold |
|--------------------------------------------------------------------------------------------|---------------------------------|-----------------------------|------------------------------|-----------------------|-------------------------------------|-------------------------------------------------------|
|                                                                                            | Mean (95% CI)                   | Mean (95% CI)               | (95% CI)                     | (95% CI)              | (95% CI)                            |                                                       |
| 1) Altering ESP direct to indirect time to:                                                |                                 |                             |                              |                       |                                     |                                                       |
| a) 1:0; NHS & PSS perspective                                                              |                                 |                             |                              |                       |                                     |                                                       |
| STAR care pathway                                                                          | 1940.69<br>(1499.90,2381.49)    | 0.52<br>(0.50,0.54)         |                              |                       |                                     |                                                       |
| Usual Care Pathway                                                                         | 2687.06<br>(2030.86, 3343.27)   | 0.50<br>(0.47,0.52)         |                              |                       |                                     |                                                       |
| STAR vs usual care                                                                         |                                 |                             | -746.37<br>(-1539.64, 46.90) | 0.03<br>(-0.007,0.06) | 1291<br>(199,2384)                  | 98.97                                                 |
| b) 1:3:NHS & PSS perspective                                                               |                                 |                             |                              |                       |                                     |                                                       |
| STAR care pathway                                                                          | 2187.37<br>(1744.53,2630.21)    | 0.52<br>(0.50,0.54)         |                              |                       |                                     |                                                       |
| Usual Care Pathway                                                                         | 2686.41<br>(2030.90,3341.92)    | 0.50<br>(0.47,0.52)         |                              |                       |                                     |                                                       |
| STAR vs usual care                                                                         |                                 |                             | -499.04<br>(-1298.46,300.37) | .03<br>(-0.007,0.06)  | 1038<br>(-58,2135)                  | 96.83                                                 |
| 2) Changing Health Care worker visit assumption from a) 6 to 3 months: NHS&PSS perspective |                                 |                             |                              |                       |                                     |                                                       |
| STAR care pathway                                                                          | 1960.13<br>(1530.27,2389.98)    | 0.52<br>(0.50,0.54)         |                              |                       |                                     |                                                       |
| Usual care                                                                                 | 2672.88<br>(2022.45,3323.32)    | 0.50<br>(0.47,0.52)         |                              |                       |                                     |                                                       |
| STAR vs UC                                                                                 |                                 |                             | -712.76<br>(-1487.09,61.57)  | 0.03<br>(-0.008,0.06) | 1244<br>(153,2335)                  | 98.73                                                 |
| 2a) 6 to 3 months: patient perspective                                                     |                                 |                             |                              |                       |                                     |                                                       |
| STAR care pathway                                                                          | 371.03(151.22,590.84)           | 0.52<br>(0.50,0.54)         |                              |                       |                                     |                                                       |
| Usual care                                                                                 | 681.39<br>(306.29,1056.48)      | 0.50<br>(0.47,0.52)         |                              |                       |                                     |                                                       |
| STAR vs usual care                                                                         |                                 |                             | -310.36<br>(-748.11,127.39)  | 0.03<br>(-0.008,0.06) | 841<br>(12,1671)                    | 97.66                                                 |
| 2b) 6 to 1 month: NHS/PSS perspective                                                      |                                 |                             |                              |                       |                                     |                                                       |
| STAR care pathway                                                                          | 1958.94<br>(1529.63,2388.25)    | 0.52<br>(0.50,0.54)         |                              |                       |                                     |                                                       |
| Usual care                                                                                 | 2663.61<br>(2013.69,3313.54)    | 0.50<br>(0.47,0.52)         |                              |                       |                                     |                                                       |

|                                                                                                                              |                              |                     |                             |                        |                    |       |
|------------------------------------------------------------------------------------------------------------------------------|------------------------------|---------------------|-----------------------------|------------------------|--------------------|-------|
| STAR vs usual care                                                                                                           |                              |                     | -704.67<br>(-1478.17,68.82) | 0.03<br>(-0.008,0.06)  | 1236<br>(146,2326) | 98.69 |
| 2b) 6 to 1 month:<br>patient perspective                                                                                     |                              |                     |                             |                        |                    |       |
| STAR care pathway                                                                                                            | 367.92<br>(148.24,587.60)    | 0.52<br>(0.50,0.54) |                             |                        |                    |       |
| Usual care                                                                                                                   | 680.34<br>(305.48,1055.20)   | 0.50<br>(0.47,0.52) |                             |                        |                    |       |
| STAR vs usual care                                                                                                           |                              |                     | -312.42<br>(-749.97,125.13) | 0.03<br>(-0.008,0.06)  | 843<br>(14,1673)   | 97.68 |
| 3.Reducing the cost<br>of equipment and<br>home changes:<br>a) by half:<br>NHS&PSS<br>perspective                            |                              |                     |                             |                        |                    |       |
| STAR care pathway                                                                                                            | 1822.56<br>(1431.25,2213.87) | 0.52<br>(0.50,0.54) |                             |                        |                    |       |
| Usual care                                                                                                                   | 2485.77<br>(1894.23,3077.32) | 0.50<br>(0.47,0.52) |                             |                        |                    |       |
| STAR vs usual care                                                                                                           |                              |                     | -663.21<br>(-1368.96,42.54) | 0.03<br>(-0.008,0.06)  | 1195<br>(162,2228) | 98.83 |
| 3a) by half: patient<br>perspective                                                                                          |                              |                     |                             |                        |                    |       |
| STAR care pathway                                                                                                            | 288.67(120.04,457.<br>30)    | 0.52<br>(0.50,0.54) |                             |                        |                    |       |
| Usual care                                                                                                                   | 534.22<br>(252.01,816.42)    | 0.50<br>(0.47,0.52) |                             |                        |                    |       |
| STAR vs usual care                                                                                                           |                              |                     | -245.54<br>(-577.06,85.97)  | 0.03<br>(-0.008,0.06)  | 777<br>(2,1551)    | 97.53 |
| 3b) by three<br>quarters:<br>NHS&PSS<br>perspective                                                                          |                              |                     |                             |                        |                    |       |
| STAR care pathway                                                                                                            | 1752.92<br>(1371.70,2134.14) | 0.52<br>(0.50,0.54) |                             |                        |                    |       |
| Usual care                                                                                                                   | 2385.52<br>(1810.91,2960.13) | 0.50<br>(0.47,0.52) |                             |                        |                    |       |
| STAR vs usual care                                                                                                           |                              |                     | -632.60<br>(-1319.39,54.20) | 0.03<br>(-0.008,0.06)  | 1164<br>(149,2179) | 98.77 |
| 3b) by three<br>quarters: patient<br>perspective                                                                             |                              |                     |                             |                        |                    |       |
| STAR care pathway                                                                                                            | 245.25<br>(92.00,398.50)     | 0.52<br>(0.50,0.54) |                             |                        |                    |       |
| Usual care                                                                                                                   | 459.88<br>(205.12,714.64)    | 0.50<br>(0.47,0.53) |                             |                        |                    |       |
| STAR vs usual care                                                                                                           |                              |                     | -214.63<br>(-513.97,84.72)  | 0.03 (-<br>0.008,0.06) | 746<br>(-14,1505)  | 97.28 |
| 4) Assuming<br>equipment and<br>home changes are<br>NHS/PSS funded if<br>funding source not<br>known. NHS&PSS<br>perspective |                              |                     |                             |                        |                    |       |

|                                                                                                                  |                              |                     |                              |                        |                    |       |
|------------------------------------------------------------------------------------------------------------------|------------------------------|---------------------|------------------------------|------------------------|--------------------|-------|
| STAR care pathway                                                                                                | 2020.58<br>(1570.68,2470.47) | 0.52<br>(0.50,0.54) |                              |                        |                    |       |
| Usual care                                                                                                       | 2660.08(2004.64,3315.53)     | 0.50<br>(0.47,0.52) |                              |                        |                    |       |
| STAR vs usual care                                                                                               |                              |                     | -639.51<br>(-1431.08,152.07) | 0.03<br>(-0.008,0.06)  | 1175<br>(86,2265)  | 98.27 |
| 5) Dropping “other” community based visits costs, which potentially could be double counted. NHS&PSS perspective |                              |                     |                              |                        |                    |       |
| STAR care pathway                                                                                                | 1965.45<br>(1523.63,2407.27) | 0.52<br>(0.50,0.54) |                              |                        |                    |       |
| Usual care                                                                                                       | 2646.40<br>(1995.94,3296.87) | 0.50<br>(0.47,0.52) |                              |                        |                    |       |
| STAR vs usual care                                                                                               |                              |                     | -680.95<br>(-1469.96,108.05) | 0.03<br>(-0.007,0.06)  | 1226<br>(123,2328) | 98.53 |
| 6) Replacing inpatient short stay and long stay non elective costs with elective costs. NHS & PSS perspective    |                              |                     |                              |                        |                    |       |
| STAR care pathway                                                                                                | 1834.00<br>(1468.10,2199.89) | 0.52<br>(0.50,0.54) |                              |                        |                    |       |
| Usual care                                                                                                       | 2333.47<br>(1802.23,2864.71) | 0.50<br>(0.47,0.52) |                              |                        |                    |       |
| STAR vs usual care                                                                                               |                              |                     | -499.47<br>(-1152.22,153.28) | 0.03 (-<br>0.008,0.06) | 1024<br>(27,2020)  | 97.80 |

<sup>1</sup> All variables are adjusted for site and baseline BPI subscores. Additionally QALYs were adjusted for baseline utility

### **STAR trial sites**

Southmead Hospital, North Bristol NHS Trust  
Princess Elizabeth Orthopaedic Centre, Royal Devon and Exeter NHS Trust  
Llandough Hospital, Cardiff and Vale University Health Board  
The Robert Jones and Agnes Hunt Orthopaedic Hospital NHS Trust  
King's Mills Hospital, Sherwood Forest Hospitals NHS Trust  
Wrightington Hospital, Wrightington, Wigan and Leigh NHS Trust  
Leicester General Hospital, University Hospitals of Leicester NHS Trust  
The Royal Orthopaedic Hospital NHS Foundation Trust

### **Trial Steering Committee members**

Paul Ewings, NIHR Research Design Service South West, Chair.  
Joy Adamson, University of Newcastle, independent member.  
George Peat, Keele University, independent member.  
Mark Rockett, Plymouth Hospitals NHS Trust/Plymouth University, independent member.  
Lizzy Betts, patient representative.

### **Members of the STAR trial group**

Tim Board, Wrightington, Wigan and Leigh NHS Foundation Trust  
Amanda Burston, University of Bristol  
Benjamin Burston, The Robert Jones and Agnes Hunt Orthopaedic Hospital  
Jane Dennis, University of Bristol  
Vikram Desai, Sherwood Forest Hospitals NHS Foundation Trust  
Paul Dieppe, University of Exeter  
Colin Esler, University Hospitals of Leicester NHS Trust  
Michael Parry, The Royal Orthopaedic Hospital NHS Foundation Trust  
Jonathan R.A. Phillips, Royal Devon and Exeter NHS Foundation Trust

## References

1. Singh JA, Mahowald ML, Noorbaloochi S. Intraarticular botulinum toxin A for refractory painful total knee arthroplasty: a randomized controlled trial. *J Rheumatol* 2010; **37**(11): 2377-86.
2. Ma SH. Denervation therapy for intractable pain of knee joint after total knee arthroplasty. *Chinese J Tissue Eng Res* 2016; **20**(31): 4589-95.
3. Pickering G, Voute M, Macian N, Ganry H, Pereira B. Effectiveness and safety of 5% lidocaine-medicated plaster on localized neuropathic pain after knee surgery: a randomized, double-blind controlled trial. *Pain* 2019; **160**(5): 1186-95.
4. Qudsi-Sinclair S, Borrás-Rubio E, Abellan-Guillén JF, Padilla Del Rey ML, Ruiz-Merino G. A comparison of genicular nerve treatment using either radiofrequency or analgesic block with corticosteroid for pain after a total knee arthroplasty: A double-blind, randomized clinical study. *Pain practice : the official journal of World Institute of Pain* 2017; **17**(5): 578-88.
5. Pilot study of PEMF therapy in treatment of post-operative pain following total knee arthroplasty. <https://clinicaltrials.gov/show/NCT02211534> 2014.
6. Radiofrequency for chronic knee pain post-arthroplasty. <https://clinicaltrials.gov/show/NCT02931435> 2016.
7. Cannabinoids vs. placebo on persistent post-surgical pain following TKA: a pilot RCT. <https://clinicaltrials.gov/show/NCT03825965> 2019.
8. Efficacy of genicular nerve radiofrequency. <https://clinicaltrials.gov/show/NCT04100707> 2019.
9. Phenol neurolysis of genicular nerves for chronic knee pain. <https://clinicaltrials.gov/show/NCT03973177> 2019.
10. Effects of Exercise and Education in Patients With Chronic Pain After Total Knee Replacement. <https://clinicaltrials.gov/show/NCT03886259> 2019.
11. Larsen JB, Skou So T, Arendt-Nielsen L, Simonsen O, Madeleine P. Neuromuscular exercise and pain neuroscience education compared with pain neuroscience education alone in patients with chronic pain after primary total knee arthroplasty: Study protocol for the NEPNEP randomized controlled trial. *Trials* 2020; **21**(1): 218.
12. Curtis L, Burns A. Unit costs of health and social care. University of Kent, Canterbury: Personal Social Services Research Unit [Available from: <https://www.pssru.ac.uk/project-pages/unit-costs/unit-costs-2020/>], 2020.
13. NHS Reference Costs 2018 to 2019. Available from: <https://improvement.nhs.uk/resources/national-cost-collection/>. London: NHS, 2020.
14. Curtis L. Unit costs of health and social care. University of Kent, Canterbury: Personal Social Services Research Unit [Available from: <https://www.pssru.ac.uk/project-pages/unit-costs/unit-costs-2013/>], 2013.
15. Curtis L, Burns A. Unit costs of health and social care. University of Kent, Canterbury: Personal Social Services Research Unit [Available from: <https://www.pssru.ac.uk/project-pages/unit-costs/unit-costs-2015/>], 2015.
16. Turner J, O' Cathain A, Knowles E, Nicholl J, Tosh J, Sampson F. Evaluation of NHS 111 pilot sites. Final Report. University of Sheffield: Medical Care Research Unit; [Available from: [https://www.sheffield.ac.uk/polopoly\\_fs/1.227404!/file/NHS\\_111\\_final\\_report\\_August\\_2012.pdf](https://www.sheffield.ac.uk/polopoly_fs/1.227404!/file/NHS_111_final_report_August_2012.pdf)]. 2012.
17. British National Formulary. London: NICE [Available from: <https://bnf.nice.org.uk/>] accessed December 2020., 2020.
18. Am I entitled to free prescriptions? London: NHS [Available from: <https://www.nhs.uk/using-the-nhs/help-with-health-costs/get-help-with-prescription-costs/>], 2020.
19. Coalville. Leicestershire: NRS Healthcare; Available from: <https://www.nrshealthcare.co.uk/>] accessed November 2020. 2020.
20. Curtis L, Burns A. Unit costs of health and social care. University of Kent, Canterbury: Personal Social Services Research Unit [Available from: <https://www.pssru.ac.uk/project-pages/unit-costs/unit-costs-2019/>], 2019.
21. Annual Survey of Hours and Earnings (ASHE). Newport, South Wales: Office for National Statistics; 2020 [Available from: <https://www.ons.gov.uk/employmentandlabourmarket/peopleinwork/earningsandworkinghours/datasets/allempleoyeesashetable1>]. 2020.
22. NHS Terms and Conditions of Service Handbook. London: The NHS Staff Council; [Available from: [https://www.nhsemployers.org/employershandbook/tchandbook/afc\\_tc\\_of\\_service\\_handbook\\_fb.pdf](https://www.nhsemployers.org/employershandbook/tchandbook/afc_tc_of_service_handbook_fb.pdf)]. 2019.
